# Supplementary material
Source: ML conference proceedings conference paper supplement (https://openreview.net/forum?id=9ktF3pwXi8)
Supplement: supplementary_material [file attachment]

## Response to Reviewer 1:

We thank the reviewer for the constructive feedback. Below are our responses to the major concerns raised. [The corresponding modified sections in the manuscript have been marked in Blue.](#)

### Weakness 1: Generalization to dynamic obstacles and extreme weather

Thank you for raising this important point. We would like to clarify that Video-LLM-based VLN models (e.g., Zhang et al. (2024a); Wei et al. (2025)) primarily target semantically rich indoor environments, whereas dynamic obstacles and extreme weather are more characteristic of outdoor settings with sparse semantics. **The primary goal of VLN research is to enable agents to interpret diverse human instructions and execute navigation actions accurately in environments with dense semantic cues. The core motivation of our work is to address a concerning trend in the VLN community: existing models increasingly prioritize visual-text alignment in long-horizon tasks while overlooking fundamental navigation skills.** To refocus on navigation competence, we designed a comprehensive automated data generation pipeline and trained a model to validate its effectiveness. Importantly, a major part of our motivation is to equip MLLMs with true all-weather and all-terrain navigation capabilities. We fully acknowledge the significance of real-world challenges and plan to extend our framework to more diverse and complex conditions in future work.

### Weakness 2: Ablation studies on Hierarchical Memory

We have supplemented ablation studies on the short-term window size ( $W$ ) and long-term memory slots ( $M$ ) in [Section 5.5 and Table 6](#). **Results show that increasing both  $W$  and  $M$  improves navigation performance up to an optimal configuration ( $W=8, M=1568$ ), while the mean+MLP aggregator achieves a favorable balance between hierarchical memory preservation and computational efficiency. The reason we did not conduct an isolated ablation for HM (i.e., TSE without HM) is that the Temporal & Segment Embeddings module is designed to depend on HM, as it incorporates temporal and semantic embeddings based on HM’s token selection.** The two components are inherently coupled in our design.

Table 1: [Ablation study on HM configuration: impact of short-term window size \( \$W\$ \), long-term memory slots \( \$M\$ \), and aggregation method.](#)

| W  | M     | Aggregator Type | VLMB          |                |               |                 |               |                |               |                 |
|----|-------|-----------------|---------------|----------------|---------------|-----------------|---------------|----------------|---------------|-----------------|
|    |       |                 | MP3D          |                |               |                 | HM3D          |                |               |                 |
|    |       |                 | SR $\uparrow$ | SPL $\uparrow$ | OS $\uparrow$ | NE $\downarrow$ | SR $\uparrow$ | SPL $\uparrow$ | OS $\uparrow$ | NE $\downarrow$ |
| 4  | 784   | Mean+MLP        | 53.2          | 51.8           | 60.3          | 3.78            | 64.7          | 63.1           | 69.2          | 3.12            |
| 8  | 784   |                 | 57.1          | 55.7           | 64.4          | 3.45            | 68.9          | 67.5           | 73.4          | 2.89            |
| 8  | 1,568 |                 | <b>60.6</b>   | <b>59.6</b>    | <b>67.6</b>   | <b>3.21</b>     | <b>71.4</b>   | <b>70.3</b>    | <b>76.3</b>   | <b>2.71</b>     |
| 16 | 1,568 |                 | 58.8          | 57.9           | 65.9          | 3.38            | 70.6          | 69.4           | 75.1          | 2.74            |
| 8  | 1,568 | N/A             | 57.7          | 56.5           | 64.2          | 3.40            | 68.9          | 67.6           | 73.8          | 3.01            |

### Weakness 3: Quantitative analysis of model complexity and efficiency

Thank you for raising this point. To ensure a fair comparison, our model was trained with the same backbone (LLaVA-Vid) and identical parameter settings as NaVid and StreamVLN. We provide additional comparisons in [Appendix B.2 and Table 8](#), including dataset size, training time, and inference speed. **Results show that our approach requires significantly less training data, reducing training cost, and achieves faster inference thanks to the streamlined instructions in VLMB.**

Table 2: [Training and inference comparison across models.](#)

| Method                  | Traning dataset | Dataset size | Traning time (GPU hours) | Inference time (s) |        |
|-------------------------|-----------------|--------------|--------------------------|--------------------|--------|
|                         |                 |              |                          | R2R                | VLMB   |
| NaVid                   | R2R+RxR+VLNdata | 953K         | 672                      | 7.9638             | /      |
| StreamVLN               | R2R+RxR+EnvDrop | 10033K       | 1500                     | 8.3288             | /      |
| Move-to-Anything (ours) | VLMB            | 40K          | 76                       | /                  | 3.0852 |

We sincerely appreciate the reviewer’s insightful comments, which have been instrumental in enhancing the quality of our manuscript.

054  
055  
056  
057  
058  
059  
060  
061  
062  
063  
064  
065  
066  
067  
068  
069  
070  
071  
072  
073  
074  
075  
076  
077  
078  
079  
080  
081  
082  
083  
084  
085  
086  
087  
088  
089  
090  
091  
092  
093  
094  
095  
096  
097  
098  
099  
100  
101  
102  
103  
104  
105  
106  
107

## Response to Reviewer 2:

We sincerely thank the reviewer for their insightful comments and constructive feedback. We have carefully revised the manuscript to address the concerns raised. Our point-by-point responses are detailed below. The corresponding modified sections in the main text have been marked in Red.

### Weakness 1: Clarification of Motivation and Comparison with Alternative Approaches

**Clarification of Motivation.** We acknowledge that the initial motivation presented in the paper may have been insufficiently elaborated. Our core argument is that the current training paradigm for end-to-end VLN models, particularly those based on Video-LLM-based frameworks, is predominantly evaluated on similar datasets (e.g., R2R, RxR). **This narrow focus has led models to overemphasize the alignment between visual inputs and lengthy navigation instructions, often at the expense of robust, fundamental navigation capabilities.** This is evidenced by the fact that SOTA models frequently fail to execute simple, direct instructions (see Figure 1 (a)). We have supplemented our analysis with an additional successful visual case study (see Appendix B.2 and Figure 8). This case demonstrates that the model does not strictly adhere to the guidance of instructions during the execution of long instructions. This further confirms that the model over-relies on visual and textual cues while neglecting the learning of fundamental navigation skills. Using the existing training paradigm to equip large models with general navigation capabilities is problematic.

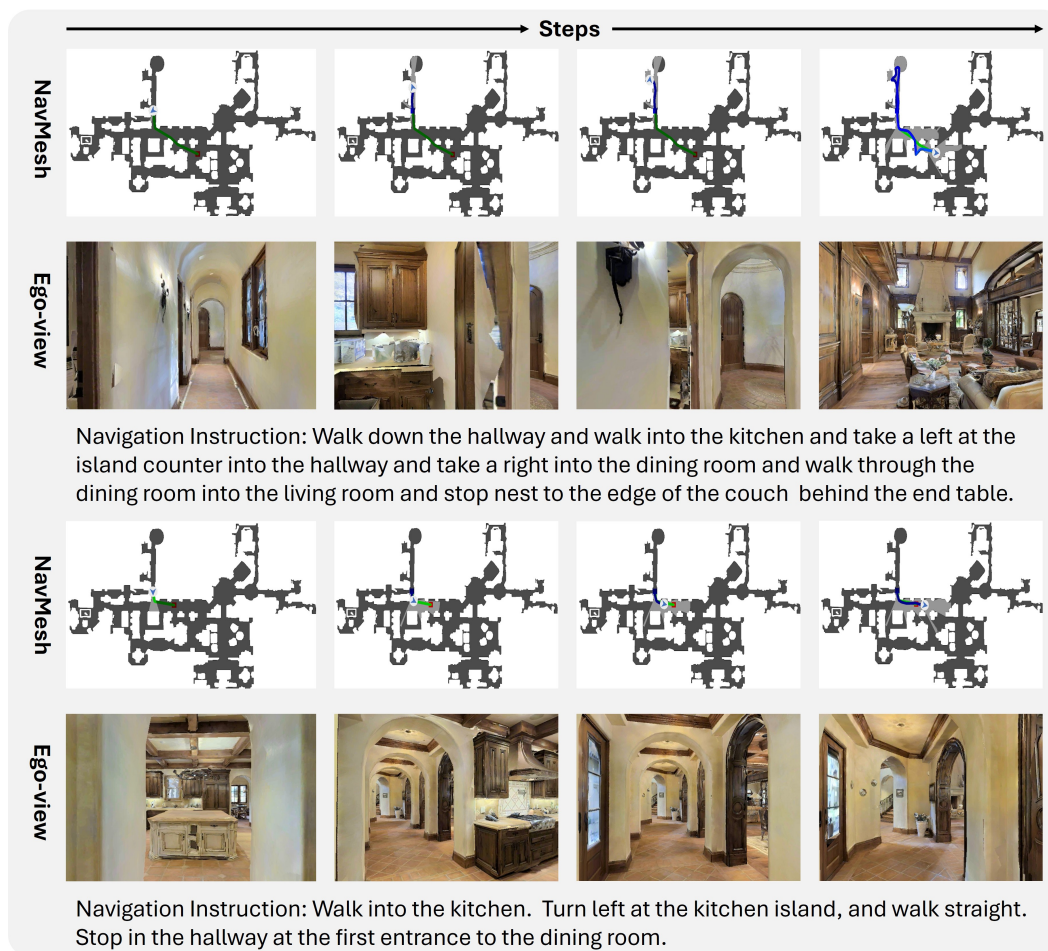

Figure 1: Visualization of successful samples in R2R. In the navigation mesh (NavMesh), the color green denotes the reference path, while blue indicates the actual path taken by the agent.

Therefore, this work aims to refocus attention on enhancing the basic navigation abilities of end-to-end models within a MLLMs framework. We propose constructing corresponding

108 **datasets and evaluation standards to ultimately foster the development of general-purpose**  
109 **navigation models.**

110  
111  
112 **Comparison with Alternative Approaches.** Regarding alternative existing approaches, these  
113 methods often lack a unified understanding and execution of language, typically requiring addi-  
114 tional modules for semantic alignment. For instance, **UniGoal** (Yin et al., 2025) (accepted to CVPR  
115 2025), presented as a zero-shot general-purpose navigation framework, achieves cross-task navi-  
116 gation through unified graph representations and LLM reasoning. **However, its performance is**  
117 **heavily dependent on the quality of dynamic scene graph construction, limiting its ability to**  
118 **handle semantically rich tasks. This is reflected in its evaluation, which includes only 5 object**  
119 **types and achieves a success rate of just 20% on text-based navigation (TextNav).** In contrast,  
120 Video-LLM-based approaches take only local observations and a navigation instruction as input  
121 to directly output actions. The VLMB dataset constructed in our work contains descriptions in-  
122 volving over 800 object types and spatial relations, providing a richer semantic foundation. We  
123 acknowledge the strengths of alternative models in specific tasks, which inspired our effort to build  
124 a more comprehensive Video-LLM-based VLN model. Moreover, we must emphasize that complet-  
125 ing navigation tasks directly from instructions without relying on external positioning information  
126 or additional vision-language understanding modules is a capability where other models consistently  
127 underperform.

### 127 **Weakness 2: Supplementary Experiments and Dataset Analysis**

128 StreamVLN and NaVid are primarily trained on VLN-CE (R2R and RxR), and their extended  
129 datasets. We conducted a detailed analysis of instruction composition in VLN-CE. Analysis (see  
130 [Appendix B.1](#)) shows that the R-Nav component in VLMB effectively decomposes and reconstructs  
131 the instruction patterns found in VLN-CE, breaking long multi-segment instructions into shorter,  
132 executable commands. **Therefore, R-Nav (instructions collected directly without labeling, e.g.,**  
133 **move to the desk) is essentially a subset of VLN-CE, and these instructions are already par-**  
134 **tially represented in existing model training sets. We observe that SOTA models handle short**  
135 **instructions less effectively than long ones (see Figure 1 (b)). This finding precisely highlights**  
136 **our key point: current training overemphasizes image-text matching at the expense of basic**  
137 **action learning.**

138 Furthermore, the suggestion you raised is highly valuable. Accordingly, we have supplemented  
139 the evaluation experiments of “Move-to-Anything” on the R2R dataset in [Section 5.4 and Table 4](#).  
140 **The results demonstrate that even with minimal external data, our approach has improved**  
141 **performance on the R2R benchmark.**

142 Table 3: [Comparison with SOTA methods on VLN-CE R2R Val-Unseen split.](#)

| Method                       | Traning Dataset | External Data | R2R Val-Unseen |                |               |                 |
|------------------------------|-----------------|---------------|----------------|----------------|---------------|-----------------|
|                              |                 |               | SR $\uparrow$  | SPL $\uparrow$ | OS $\uparrow$ | NE $\downarrow$ |
| NaVid (Zhang et al., 2024a)  | R2R+RxR+VLNdata | 953K          | 37.4           | 25.9           | 49.1          | 5.47            |
| StreamVLN (Wei et al., 2025) | R2R+RxR+EnvDrop | 10033K        | 45.5           | 41.6           | 53.8          | 6.05            |
| Move-to-Anything* (ours)     | R2R+RxR         | 0k            | 33.6           | 30.1           | 43.1          | 7.00            |
| Move-to-Anything (ours)      | R2R+RxR+VLMB    | 40K           | 38.0 (+4.4)    | 34.5 (+4.4)    | 43.2 (+0.1)   | 6.45 (-0.55)    |

### 148 **Weakness 3: Core Problem Addressed by VLMB**

149  
150 We contend that the core issue in current research may stem from a fundamental misjudgment of  
151 the primary challenges in MLLM-based VLN models. The prevailing paradigm treats the alignment  
152 between long instructions and navigation observations as the central challenge in VLN, leading re-  
153 searchers to concentrate on training and evaluation using long-horizon navigation data. **Our novelty**  
154 **lies in demonstrating that a primitive-based curriculum is a more effective path to solving the**  
155 **hard long-horizon problem than end-to-end training alone.**

156 We emphasize that while R-Nav (instructions collected directly without labeling, e.g., move to the  
157 desk) decomposes long-horizon instructions, it does not simplify the navigation task itself. **Instead,**  
158 **VLMB expands the diversity of goal distributions, spatial (e.g., orientation, position, region)**  
159 **and semantics (e.g., color, size, material) in single-step navigation, refocusing research on the**  
160 **execution of basic commands.** The Move-to-Anything model serves as a closed-loop validation  
161 of the identified problem. **To ensure a fair comparison, our methodological innovations are**  
**intentionally minimal yet effective, designed to introduce no additional training overhead.**

---

## Responses to Additional Questions

### Q1: The classification of Modular Methods

We have refined the description of Related Work (Section 2) as suggested. Furthermore, although advancements in end-to-end network architectures have led to works (Chen et al., 2021; 2022b) that build navigation systems based on deep neural networks or Transformers, these methods, in practice, still depend on external positioning systems (e.g., GPS or SLAM) or multi-sensor inputs (e.g., depth, panoramic images). **Therefore, unifying perception and planning is crucial for enhancing decision consistency and generalization, which is vital for the practical deployment of VLN.**

### Q2: Scene Selection Criteria

VLN tasks are inherently designed for semantically rich indoor environments, and MP3D and HM3D are widely adopted benchmarks specifically built for such settings. To maximize the utility of these resources, we have extended the semantic (e.g., color, size, material) and spatial (e.g., orientation, position, region) descriptions within these scenes by building an automated collection and annotation process. **Compared to existing datasets, our constructed dataset offers significantly richer object categories and more detailed descriptions (as shown in Table 1 and Figure 3), thereby enhancing diversity and expressiveness while maintaining compatibility with standard VLN environments.**

### Q3: Standardizing the Use of the Term ObjNav

Following the suggestion, we have renamed the initial navigation instructions (e.g., *move to the desk*) to **Raw Navigation (R-Nav)** instructions.

### Q4: Statistical Analysis of Common Instruction Formats

We conducted a quantitative analysis of common instruction formats based on R2R and RxR, along with a detailed description of the definitions and classification methodology for the four instruction types, which is included in [Appendix B.1](#) and [Table 7](#).

Table 4: Proportions of common navigation primitive types.

| Navigation Primitive | Instruction Numbers | Percentage |
|----------------------|---------------------|------------|
| Move                 | 227,189             | 42%        |
| Situation            | 200,143             | 37%        |
| Change Direction     | 70,320              | 13%        |
| Change Region        | 43,274              | 8%         |

### Q5: Using Navigation Primitives to Solve Object-centric Tasks

We conducted a thorough analysis of common instruction composition (summarized in [Appendix B.1](#)), confirming that the “move-to” primitive covers most navigation scenarios. For object-centric tasks like REVERIE (a more challenging navigation and localization task), we believe that equipping models with fundamental navigation skills and leveraging LLM reasoning could address this within our proposed framework. We sincerely appreciate this suggestion and will prioritize REVERIE in future evaluations. However, we wish to emphasize that basic, in-field-of-view navigation remains an overlooked aspect in Video-LLM training. Our work is the first to identify this issue and provide a demonstrated solution.

We are grateful for the reviewer’s valuable feedback, which has significantly strengthened our manuscript.

---

### Response to Reviewer 3:

We greatly appreciate the reviewer’s thoughtful comments and valuable suggestions. The manuscript has been thoroughly revised to address all raised concerns. Detailed point-by-point responses are provided below, and **all corresponding changes in the main text are highlighted in Green.**

#### Weakness 1: Impact of Instruction Length on VLA Model Performance

We conducted an instruction decomposition analysis on VLN-CE (R2R and RxR), as shown in [Appendix B.1](#). The analysis reveals that while these datasets exhibit linguistic diversity, the instructions suffer from vague descriptions, ill-defined sub-goals, and significant homogeneity in target categories. In fact, since VLN-CE was designed long before the maturity of MLLMs, it was not constructed following the training paradigm widely recognized in VLA research—where models first acquire basic skills (e.g., pick up, put down) through foundational action training before progressing to multi-step reasoning for long-horizon tasks. Moreover, due to instructional ambiguity, training tends to overfit to visual observations and navigation instructions, resulting in many “successful” trajectories that reach the final goal without accomplishing intermediate sub-goals. **Consequently, current evaluation paradigms cannot accurately assess a model’s success rate in achieving individual navigation sub-goals, as shown in [Figure 8](#).**

To address these issues, we prioritize rectifying the training paradigm. By constructing “move-to” navigation instructions, we aim to equip the model with stable goal-oriented navigation capabilities based on single-step directives. These segmented “move-to” instructions are then combined to accomplish long-horizon tasks. As shown in [Table 3](#), when consecutive sub-goals increase (e.g., three sub-goals), the overall success rate naturally declines. **However, we emphasize that in practical navigation, future sub-goals are updated incrementally based on ongoing environmental observations. With new instructions issued dynamically in response to navigation observations, the success rate remains consistent.** For this reason, we deliberately restrict the training set to single-step navigation instructions and introduce multi-goal instructions only during evaluation. This approach ensures that executing sequential single-step navigation tasks can fulfill long-term demands while avoiding overfitting to image-instruction alignment—where models might bypass intermediate targets and proceed directly to the final goal.

#### Weakness 2: The Concept of Using Short-term and Long-term Frames

To balance recent detail fidelity with global context in long-horizon reasoning, we adopt a hierarchical memory that explicitly separates short-term (ST) and long-term (LT) observations. Concretely, the most recent short-term window ( $W$ ) frames are encoded by a frozen vision tower and retained as high-fidelity multi-token visual embeddings, which are injected into the LLM (as `<image>`) to remain sensitive to immediate environmental changes. **Earlier frames are not stored in full. Instead, each frame is first globally pooled into a per-frame feature. These features are then aggregated via a lightweight mean pooling and an MLP into a fixed number of long-term memory slots ( $M$ ). This process, summarized as `<history>`, maintains essential global context at a low token cost.** Consequently, the memory does *not* keep all tokens from all frames: only the  $W$  most recent frames preserve multi-token detail, while prior frames are compressed into  $M$  slots. This decoupling reduces token complexity from  $O(T \times S)$  to  $O(W \times S + M)$ , where  $T$  is the total number of frames and  $S$  is the spatial token count, substantially lowering computational and memory costs without sacrificing useful recent detail.

We have supplemented ablation experiments to clarify this issue. Specifically, [Table 6](#) reports results when varying the short-term window size ( $W$ ) and the number of long-term memory slots ( $M$ ). We also compare our default mean+MLP aggregation strategy with a no-aggregation baseline. The findings show that increasing  $W$  and  $M$  improves navigation performance up to an optimal configuration ( $W=8$ ,  $M=1568$ ). Moreover, the mean+MLP aggregator achieves a favorable balance between preserving hierarchical memory and maintaining computational efficiency.

Table 5: Ablation study on HM configuration: impact of short-term window size ( $W$ ), long-term memory slots ( $M$ ), and aggregation method.

| W  | M     | Aggregator Type | VLMB          |                |               |                 |               |                |               |                 |
|----|-------|-----------------|---------------|----------------|---------------|-----------------|---------------|----------------|---------------|-----------------|
|    |       |                 | MP3D          |                |               |                 | HM3D          |                |               |                 |
|    |       |                 | SR $\uparrow$ | SPL $\uparrow$ | OS $\uparrow$ | NE $\downarrow$ | SR $\uparrow$ | SPL $\uparrow$ | OS $\uparrow$ | NE $\downarrow$ |
| 4  | 784   | Mean+MLP        | 53.2          | 51.8           | 60.3          | 3.78            | 64.7          | 63.1           | 69.2          | 3.12            |
| 8  | 784   |                 | 57.1          | 55.7           | 64.4          | 3.45            | 68.9          | 67.5           | 73.4          | 2.89            |
| 8  | 1,568 |                 | <b>60.6</b>   | <b>59.6</b>    | <b>67.6</b>   | <b>3.21</b>     | <b>71.4</b>   | <b>70.3</b>    | <b>76.3</b>   | <b>2.71</b>     |
| 16 | 1,568 |                 | 58.8          | 57.9           | 65.9          | 3.38            | 70.6          | 69.4           | 75.1          | 2.74            |
| 8  | 1,568 | N/A             | 57.7          | 56.5           | 64.2          | 3.40            | 68.9          | 67.6           | 73.8          | 3.01            |

### Weakness 3: Dataset Built on Off-the-shelf Scenes

We acknowledge that our dataset is collected using off-the-shelf scenes and simulators. However, as you noted, VLN tasks are inherently designed for semantically rich indoor environments, and MP3D and HM3D are widely adopted benchmarks specifically built for such settings. **To maximize the utility of these resources, we have extended the semantic (e.g., color, size, material) and spatial (e.g., orientation, position, region) descriptions within these scenes by building an automated collection and annotation process.** Compared to existing datasets, our constructed dataset offers significantly richer object categories and more detailed descriptions (as shown in Table 1 and Figure 3), thereby enhancing diversity and expressiveness while maintaining compatibility with standard VLN environments.

### Responses to Additional Questions

#### Q1: Supplementary Experiments and Dataset Analysis

We have verified that the compact dataset proposed in this paper effectively enhances the model’s fundamental navigation skills. To further validate the contribution of the VLMB dataset to navigation capability, we conducted joint training using VLMB together with R2R and RxR datasets—even though we maintain that the instruction composition of R2R alone is insufficient for equipping models with general navigation competence. **Experimental results (Table 4) show that by incorporating even a small amount of VLMB data during joint training, the model achieves higher performance levels on R2R, demonstrating the usefulness and effectiveness of the VLMB dataset.**

- A model (LLaVA-Vid) trained on R2R+RxR evaluated on R2R
- A model (LLaVA-Vid) trained on R2R+RxR+VLMB evaluated on R2R

Table 6: Comparison with SOTA methods on VLN-CE R2R Val-Unseen split.

| Method                       | Traning Dataset | External Data | R2R Val-Unseen |                |               |                 |
|------------------------------|-----------------|---------------|----------------|----------------|---------------|-----------------|
|                              |                 |               | SR $\uparrow$  | SPL $\uparrow$ | OS $\uparrow$ | NE $\downarrow$ |
| NaVid (Zhang et al., 2024a)  | R2R+RxR+VLNdata | 953K          | 37.4           | 25.9           | 49.1          | 5.47            |
| StreamVLN (Wei et al., 2025) | R2R+RxR+EnvDrop | 10033K        | 45.5           | 41.6           | 53.8          | 6.05            |
| Move-to-Anything* (ours)     | R2R+RxR         | 0k            | 33.6           | 30.1           | 43.1          | 7.00            |
| Move-to-Anything (ours)      | R2R+RxR+VLMB    | 40K           | 38.0 (+4.4)    | 34.5 (+4.4)    | 43.2 (+0.1)   | 6.45 (-0.55)    |

#### Q2: Analysis of Training Dataset

StreamVLN and NaVid are primarily trained on VLN-CE (R2R and RxR), and their extended datasets. We conducted a detailed analysis of instruction composition in VLN-CE, and this analysis (see Appendix B.1) shows that the R-Nav component in VLMB effectively decomposes and reconstructs the instruction patterns found in VLN-CE, breaking long multi-segment instructions into shorter, executable commands. **Therefore, R-Nav (instructions collected directly without labeling, e.g., move to the desk) is essentially a subset of VLN-CE, and these instructions are already included in existing model training sets.** However, while current SOTA models perform well on long-instruction tasks, they struggle on this subset—precisely highlighting our key argument: existing training paradigms overemphasize image-text alignment while neglecting the learning of fundamental navigation actions.

The constructive feedback provided by the reviewer has greatly improved the rigor and clarity of our work, for which we are deeply thankful.

# FROM END-TO-END TO STEP-BY-STEP: LEARNING COMPOSABLE NAVIGATION PRIMITIVES FOR VISION-LANGUAGE NAVIGATION

**Anonymous authors**

Paper under double-blind review

## ABSTRACT

Recent Vision-Language Navigation (VLN) research with Multi-modal Large Language Models (MLLMs) has broadly adopted end-to-end training on long-horizon instruction datasets. However, human navigation mainly relies on the sequential execution of simple primitives guided by immediate observations. Our analysis shows that, although VLN models reported achieving promising results on long-horizon instructions, they struggle with basic navigation primitives (e.g., move, change region). To the best of our knowledge, we are the first to point out this phenomenon. To address this, we propose a primitive-based paradigm that first learns core skills and then composes them into long-horizon behaviors. We design a unified data pipeline to construct Vision-Language-Move-Base (VLMB), the first controllable benchmark centered on the move-to primitive, covering 206 scenes and 873 object instances. Based on VLMB, we develop Move-to-Anything, a model equipped with a memory mechanism that balances historical context with current observations. Experiments demonstrate that existing VLN models achieve only a 43.8% success rate in MP3D; our approach reaches 60.6% in MP3D and 71.4% in HM3D, exhibiting substantially stronger compositional generalization. These results highlight the effectiveness of primitive-based learning for building robust and generalizable navigation agents.

## 1 INTRODUCTION

Vision-Language Navigation (VLN) aims to develop autonomous agents that can understand natural language instructions and perform navigation tasks effectively. Achieving efficient and stable performance in VLN is a crucial step toward building intelligent robotic systems. Accordingly, substantial research in this field has adopted modular methods, which decompose the navigation pipeline into separate components such as perception, decision-making, planning, and control (Chen et al., 2023; Zhang et al., 2025b; Ma et al., 2025). However, according to the “weakest link” principle, the overall system performance is often limited by its least competent module, and such modular designs frequently hinder effective collaboration between perception and planning.

With recent progress in Multi-modal Large Language Models (MLLMs), end-to-end approaches for VLN have emerged as a promising alternative (Zheng et al., 2024; Cheng et al., 2025). Representative systems such as NaVid (Zhang et al., 2024a) and StreamVLN (Wei et al., 2025) leverage existing VLN instruction datasets (Anderson et al., 2018; Ku et al., 2020; Krantz et al., 2020) and collect visual data from simulators to train general-purpose MLLMs for VLN tasks. These methods significantly improve the alignment between visual perception and language instructions, thereby facilitating applications in embedded AI and human-computer interaction.

Although the field of VLN has made notable progress, current end-to-end VLN models are still primarily trained using instruction paradigms from early datasets such as R2R (Anderson et al., 2018) and RxR (Ku et al., 2020), as well as datasets repeatedly collected or processed based on these foundations (Tan et al., 2019). These paradigms often include complex instructions like: “Walk to the right of the couch and through the doors to the tan couch. Pass through the dining room and wait outside.” Such instruction formats often involve high task complexity and long sequences. Though researchers assume that training MLLM on such datasets is enough to accomplish long-horizon

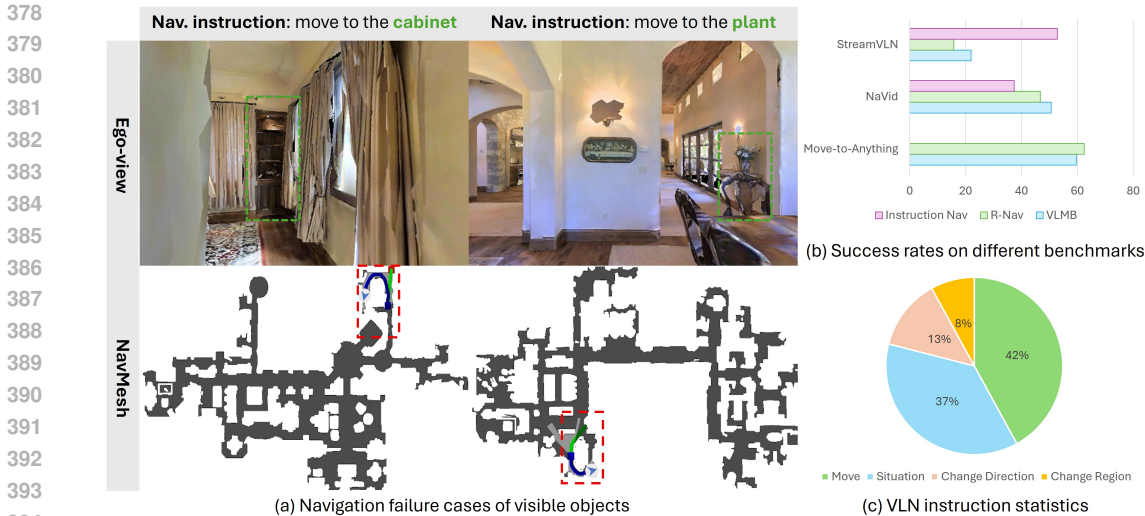

Figure 1: Analysis of existing SOTA models and classic VLN datasets. Figure (a) shows two simple navigation instructions. The NavMesh reveals that the agent stops at incorrect locations. Figure (b) presents the performance of SOTA models on different benchmarks. Figure (c) illustrates the proportional breakdown of instruction types in existing datasets.

navigation tasks, real-world navigation tasks mainly focus on simple, multi-step guidance, such as “Move to the couch, then move to the tan couch.”, and our experiments show that existing models fail to execute these general but straightforward instructions effectively, as illustrated in Figure 1(a). In reality, while general-purpose MLLMs possess strong visual and linguistic understanding capabilities, they lack foundational navigation skills—the ability to execute correct basic actions even in simple environments. Training them directly on long-horizon datasets causes them to skip this essential foundational training phase. Consequently, the model’s output primarily focuses on aligning visual observations with instructions, neglecting core navigation competency. The visualization of several successful case in Appendix B.2 Figure 8 serves as compelling evidence for this viewpoint.

To better understand this issue, we conducted a systematic evaluation of SOTA VLN models. The results reveal that models trained under current paradigms perform poorly on basic single-step navigation tasks. Surprisingly, their success rates on these tasks are even lower than on long-horizon instructions (see Figure 1(b)). We identify two significant limitations in existing datasets: (1) Early datasets were designed for modular VLN methods and emphasize long-horizon instruction following, with limited attention to basic navigation tasks. (2) Existing datasets lack sufficient spatial and semantic coverage, which restricts the model’s ability to learn general navigation capabilities.

To overcome these issues, we begin to explore a low-cost, step-by-step training paradigm that enables general-purpose MLLMs to incrementally and reliably acquire fundamental navigation skills.

We performed a statistical analysis of existing instruction sets. We found that, despite their apparent complexity, most instructions can be categorized into four basic navigation primitives: *situation*, *move*, *change direction*, and *change region*. We define these categories as navigation primitives. Among them, *move* is the most common, accounting for 42% of all instructions (see Figure 1(c)). A quantitative examination of the instruction distribution is presented in Appendix B.1 Table 7. At the same time, most navigation tasks can be encapsulated by “move-to” instructions that incorporate spatial and semantic information. For example, the “change region” primitive can be accomplished by combining the “move-to” primitive with spatial relationships between regions to achieve the final navigation task. More interestingly, human navigation reasoning also relies on the sequential execution of single-step primitives based on immediate observations. By moving from one observation point to another, humans achieve long-horizon navigation goals. This motivates our focus on “move-to” training at the primitive-level for MLLMs.

To achieve the step-by-step training paradigm, we introduce Vision-Language-Move-Base (VLMB). We collected an initial set of raw navigation instructions (R-NaV) and extended them to form the

**VLMB dataset with semantic and spatial annotations.** VLMB automated data generation pipeline integrates 206 semantic scenes from the MP3D (Chang et al., 2017) and HM3D-Semantic (Ramakrishnan et al., 2021) datasets, which comprises over 873 distinct target instances. This dataset is designed to isolate, evaluate, and improve the core “move-to” capability in VLN. The dataset construction begins with a rule-based collection of basic “move-to” instructions. These instructions are then expanded through MLLM-based cross-validation into versions enriched with spatial and semantic information, thereby capturing the diversity and ambiguity of natural language. An interactive verification process ensures high data quality while incorporating spatial and semantic cues to improve the understanding of models of both objects and scenes. Furthermore, we compose navigation primitives to execute basic navigation tasks in a stepwise manner, ultimately achieving controllable long-horizon navigation.

To ensure fair evaluation and validate data quality, we use the same base model (Zhang et al., 2024c) as employed in current SOTA approaches. For the navigation task, we design a hierarchical memory mechanism that combines temporal-semantic embedding with historical context to balance current observations. Models trained on our dataset exhibit substantial improvements in success rates for executing navigation primitives. Our contributions are summarized as follows:

- We systematically identify a critical weakness in end-to-end VLN systems: poor performance on core navigation primitives. On the “move-to” primitive, SOTA models achieve only **43.8%** success rate in MP3D, underscoring a fundamental gap in skills required for long-horizon navigation.
- We develop an automated data generation pipeline that features target acquisition, spatial-semantic enrichment, and MLLM-assisted interactive validation. Finally, construct the **VLMB** dataset focused on the “move-to” primitive. VLMB includes **206** scenarios and **873** object instances, augmented with multi-dimensional spatial-semantic annotations and composable long-horizon instructions. To the best of our knowledge, this is the first step-by-step training dataset specifically designed for end-to-end VLN models.
- We propose a hierarchical memory mechanism incorporating temporal and segment embeddings to balance historical context and current observations. Experiments demonstrate that targeted training on VLMB markedly improves model performance: general-purpose MLLMs improve from **43.8%** to **60.6%** in MP3D and attain **71.4%** in HM3D, affirming the efficacy of our stepwise, primitive-centric approach for enhancing VLN capability.

## 2 RELATED WORK

**Vision-and-Language Navigation (VLN).** The VLN task requires an agent to acquire observational information from the environment and execute specific navigation actions based on natural language instructions. Classical VLN approaches adopt modular architectures (Cai et al., 2024; Yokoyama et al., 2024a; Wanchoo et al., 2024; Chen et al., 2022a; 2024; Yin et al., 2025), decomposing the navigation pipeline into distinct components such as perception, language understanding, mapping, planning, and control. These modules share information to collectively complete the process from instruction interpretation to action execution. However, such systems heavily rely on the construction and alignment of graph structures between scene understanding and language interpretation. They are susceptible to failures if the perception module cannot acquire sufficient scene information, and they suffer from limited inter-module coordination. **Furthermore, although advancements in end-to-end network architectures have led to works (Chen et al., 2021; 2022b) that build navigation systems based on deep neural networks or Transformers, these methods, in practice, still depend on external positioning systems (e.g., GPS or SLAM) or multi-sensor inputs (e.g., depth, panoramic images). Therefore, unifying perception and planning is crucial for enhancing decision consistency and generalization, which is vital for the practical deployment of VLN.**

**Video-model-based End-to-End VLN.** End-to-end approaches utilizing MLLMs (Zhou et al., 2024; Long et al., 2024; Zheng et al., 2024; Zhang et al., 2025a) present a promising alternative by integrating perception, decision-making, and planning into a unified framework. Given adequate data, MLLMs can directly infer navigation actions from RGB observations and language input, eliminating the need for sensor-based localization or explicit mapping. Existing video-model-based VLN systems (e.g., (Zhang et al., 2024a; Cheng et al., 2025; Wei et al., 2025)) are typically trained and

Table 1: A comparative analysis with existing VLN and ObjNav benchmarks.

| Benchmark                           | Task Type   | Simulator    | Scenes | Instruction Dimension            | Object Categories |
|-------------------------------------|-------------|--------------|--------|----------------------------------|-------------------|
| R2R (Anderson et al., 2018)         | VLN         | Matterport3D | 61     | original goal+ spatial           | 21                |
| RxR (Ku et al., 2020)               | VLN         | Matterport3D | 61     | original goal+ spatial           | 21                |
| VLN-CE (Krantz et al., 2020)        | VLN         | Habitat      | 61     | original goal+ spatial           | 21                |
| GSA-R2R (Hong et al., 2025)         | VLN         | Habitat      | 150    | original goal+ spatial+ semantic | 21                |
| MP3D ObjectNav (Chang et al., 2017) | ObjNav      | Habitat      | 61     | original goal                    | 21                |
| HM3D-OVON (Yokoyama et al., 2024b)  | ObjNav      | Habitat      | 145    | original goal                    | 379               |
| Goat-Bench (Chang et al., 2023)     | ObjNav      | Habitat      | 145    | original goal+ semantic          | 312               |
| VLMB (ours)                         | VLN+ ObjNav | Habitat      | 206    | original goal+ spatial+ semantic | 873               |

evaluated on long-horizon navigation datasets like R2R (Anderson et al., 2018) and RxR (Ku et al., 2020), which are designed around long trajectories and complex, often ambiguous, instructions. However, these datasets were originally created to evaluate the complex instruction understanding and long-term memory capabilities of modular methods, without considering the functional characteristics of MLLMs. This paper aims to address this critical missing step in training video-based VLN models by introducing the concept of navigation primitives. We propose a comprehensive pipeline to build more stable and effective general-purpose navigation systems, ensuring MLLMs acquire fundamental navigation abilities step-by-step.

### 3 DATASET: VISION-LANGUAGE-MOVE-BASE

#### 3.1 PROBLEM SETUP

Given ego-view observations and a language-based navigation instruction, the agent is required to execute a sequence of discrete actions—such as rotating left or right, moving forward, and stopping—to reach a target object or location and halt at the appropriate moment. An episode is deemed successful if the agent stops within a predefined distance threshold from the target (e.g., within a specified radius). A maximum step limit constrains each episode.

Focusing on the “move-to” navigation primitive, we constructed a training set that includes 61 scenes from MP3D (Chang et al., 2017) and 145 scenes from HM3D (Ramakrishnan et al., 2021). For evaluation, we curated an evaluation set consisting of 11 MP3D scenes and 36 previously unseen HM3D scenes. Benefiting from the open semantic annotations provided by HM3D-Semantic, our benchmark covers a richer variety of scenes and a broader range of target instances compared to previous VLN and Object Navigation (ObjNav) datasets, as shown in Table 1.

#### 3.2 COLLECTION PROTOCOL

Our data collection pipeline is built upon the Habitat-Sim simulator. Each navigation episode begins from a randomly sampled starting pose, with the target object selected from visually observable entities within the agent’s initial field of view. The VLMB construction pipeline consists of three systematically organized stages: (1) an automated target object sampling strategy, (2) a dataset assembly process that incorporates instruction enrichment and interactive validation, and (3) a modular sequential instruction generation pipeline that supports composition operations, as illustrated in Figure 2.

**Stage 1: Automated Goal-Oriented Object Sampling.** In the first stage, the data collection process automatically selects a visible object as the navigation target, while enforcing constraints to ensure that the target is both meaningful and navigable. The target must lie within a distance range of 3–10 meters and be reachable on the Navmap in Habitat-Sim. It must also be visually and semantically distinguishable from surrounding objects to avoid ambiguity. It must belong to a category relevant to navigation, excluding semantically uninformative classes such as *floor* or *wall*. The simulator’s path planner validates all selected targets to confirm reachability within the navigation graph, and automated checks are applied to eliminate scenarios prone to collisions or excessive path lengths. The specific rules are described in Appendix A.1.

**Stage 2: Instruction Enrichment and dataset Construction.** In the second stage, we capture the first-frame observation of each episode and employ a high-performing proprietary MLLM



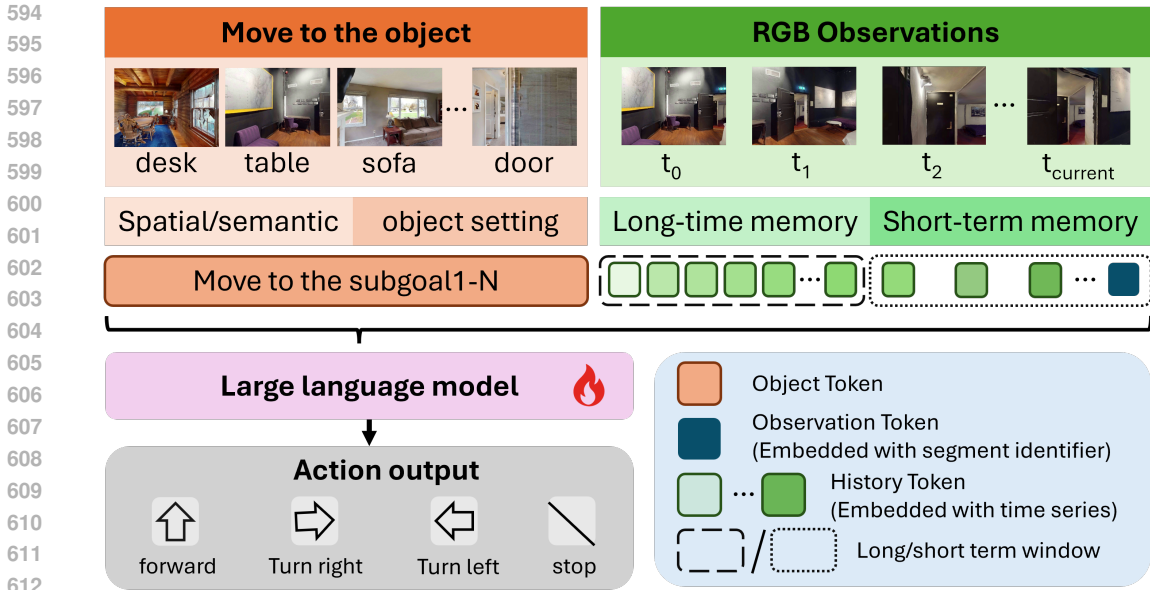

Figure 4: Move-to-Anything framework: architectural overview and modular components.

### 3.3 DATA FORMAT AND ANALYSIS

We collected 30K data samples and retained 15K samples for training after filtering. The word cloud of object categories appearing in MP3D and HM3D is illustrated in Figure 3. Each sample contains a R-Nav instruction (Move to the object) and a VLMB instruction enriched with spatial and semantic descriptions. We randomly sampled a subset of the improved data for manual verification, confirming that the constructed VLMB dataset exhibits high annotation quality. To ensure diversity and coverage, we perform balanced sampling across a wide range of houses and room types, while minimizing the repetition of goals and instructions within the same environment. The details of the dataset construction are provided in Appendix A.3.

To ensure a fair and reliable evaluation of model performance, we construct a dedicated benchmark comprising unseen scenes. Additionally, multi-step instruction compositions are exclusively included in the evaluation set. Beyond the three-stage construction strategy described above, we further apply rigorous manual filtering on top of large model-based selection to guarantee the quality of the evaluation set. These settings enable a thorough assessment of the model’s generalization ability in new, unfamiliar objects and paraphrased instructions. Detailed analysis is provided in Appendix B.

## 4 METHOD: MOVE-TO-ANYTHING

Built on LLaVA-Video (Zhang et al., 2024c), which employs Qwen2 (Team, 2024) as the underlying language model, our approach formulates the agent as a multimodal policy that jointly encodes visual observations and language instructions within a unified autoregressive framework to predict discrete actions (e.g., turn, move forward, stop). We train the model using the R-Nav and VLMB datasets constructed in Section 3.

Within this unified pipeline, we introduce two lightweight yet practical temporal memory enhancements to address the high demand for historical context in navigation tasks: (1) a Hierarchical Memory module that preserves critical temporal context while strictly controlling sequence length, and (2) Temporal & Segment Embeddings layered atop the hierarchical memory to explicitly encode recency and memory source, thereby stabilizing long-horizon reasoning and attention allocation. The overall architecture of the Move-to-Anything framework is illustrated in Figure 4.

#### 4.1 HIERARCHICAL MEMORY

To balance recent detail fidelity with global context in long-horizon reasoning, we introduce a hierarchical memory mechanism that separates historical observations into short-term (ST) and long-term (LT) components. Recent frames are encoded by a frozen vision tower, lightly pooled in 2D, and retained as high-fidelity multi-token representations, which are injected into the language model to capture immediate environmental changes. Earlier frames are globally pooled into per-frame features and aggregated into a fixed number of memory slots using a lightweight mean pooling followed by an MLP, achieving an effective trade-off between context preservation and computational efficiency.

This design integrates seamlessly with placeholder-based prompting: ST tokens are inserted as `<image>` and LT summaries as `<history>`. Prefix caching and sliding-window updates further enable efficient streaming inference. By explicitly decoupling ST and LT, token complexity is reduced from  $O(T \times S)$  to  $O(W \times S + M)$ , where  $T$  is the total number of frames,  $S$  the spatial token count,  $W$  the short-term window size, and  $M$  the number of long-term memory slots. This significantly lowers computational and memory costs without sacrificing recent detail, improving stability and throughput for long-context reasoning.

#### 4.2 TEMPORAL & SEGMENT EMBEDDINGS

Building upon the hierarchical memory structure, we introduce two lightweight and learnable embeddings—temporal and segment embeddings—that do not increase the sequence length. For each visual token  $x$  from frame  $t$  and segment  $s$  (either ST or LT), we construct:

$$\tilde{x} = x + E_{\text{time}}[t] + E_{\text{seg}}[s].$$

Here, the temporal embedding  $E_{\text{time}}[t]$  encodes the frame index to provide explicit recency cues. In contrast, the segment embedding  $E_{\text{seg}}[s]$  identifies the token’s origin, distinguishing current observations from aggregated memory. These embeddings are added to visual tokens before fusion with text tokens under the same autoregressive objective. Visual tokens are masked using `IGNORE`, requiring no modification to the training loss.

This explicit conditioning improves attention allocation by prioritizing current evidence before consulting memory, and reduces cross-segment interference, thereby stabilizing long-horizon reasoning. The approach introduces negligible computational overhead while significantly enhancing temporal grounding and memory retrieval efficiency. Moreover, it remains fully compatible with the minimal multimodal injection design of MLLMs.

## 5 EXPERIMENTS

### 5.1 SETTINGS

**Scene Assets and Evaluation Benchmark.** We construct our experimental environment using the MP3D (Chang et al., 2017) and HM3D (Ramakrishnan et al., 2021) datasets, which together comprise 206 training scenes and 47 unseen evaluation scenes, encompassing over 3,000 rooms with diverse layouts, including kitchens, living rooms, and offices. Semantic annotations were collected for 873 object instances, including doors, table lamps, and televisions. For evaluation, we sample 1,000 instances each from unseen MP3D and HM3D scenes. All evaluations are conducted in Habitat-Sim using R-Nav and VLMB instructions, and are measured with standard VLN metrics: Success Rate (SR), Success weighted by Path Length (SPL), Oracle Success Rate (OS), and Navigation Error (NE).

**Training and Evaluation Settings.** We build the Move-to-Anything framework on top of the LLaVA-Video-7B model (Zhang et al., 2024c), which utilizes Qwen2-7B (Team, 2024) as the language model and adopts the ViT-based visual encoder from SigLIP (Zhai et al., 2023). The visual encoder remains frozen during training. For optimization, we employ the Adam optimizer with a learning rate of  $3 \times 10^{-5}$ . In the simulation, we use the Stretch robot from Hello Robot. Stretch is equipped with a wheeled base and a manipulator mounted on a structural frame, and it executes four discrete actions: turn left, turn right, move forward, and stop. The robot is fitted with an RGB camera to capture front-view images.

Table 2: Comparison with previous methods on R-Nav and VLMB. Best results are in **bold**. NaVid was not included in the HM3D comparison because it was not trained on the HM3D environment.

| Method                           | R-Nav         |                |               |                 |               |                |               |                 | VLMB          |                |               |                 |               |                |               |                 |
|----------------------------------|---------------|----------------|---------------|-----------------|---------------|----------------|---------------|-----------------|---------------|----------------|---------------|-----------------|---------------|----------------|---------------|-----------------|
|                                  | MP3D          |                |               |                 | HM3D          |                |               |                 | MP3D          |                |               |                 | HM3D          |                |               |                 |
|                                  | SR $\uparrow$ | SPL $\uparrow$ | OS $\uparrow$ | NE $\downarrow$ | SR $\uparrow$ | SPL $\uparrow$ | OS $\uparrow$ | NE $\downarrow$ | SR $\uparrow$ | SPL $\uparrow$ | OS $\uparrow$ | NE $\downarrow$ | SR $\uparrow$ | SPL $\uparrow$ | OS $\uparrow$ | NE $\downarrow$ |
| <b>MLLMs as Agent</b>            |               |                |               |                 |               |                |               |                 |               |                |               |                 |               |                |               |                 |
| Vedio-LLaVA (Lin et al., 2024)   | 14.1          | 12.5           | 34.7          | 4.91            | 15.2          | 14.6           | 43.1          | 5.02            | 13.4          | 12.3           | 34.3          | 4.96            | 15.3          | 14.1           | 39.2          | 5.21            |
| LLaVA-NEXT (Zhang et al., 2024b) | 12.1          | 10.5           | 31.5          | 5.46            | 14.2          | 13.5           | 39.4          | 5.45            | 11.2          | 10.5           | 33.1          | 5.34            | 12.3          | 11.5           | 35.7          | 5.56            |
| <b>Method for VLN</b>            |               |                |               |                 |               |                |               |                 |               |                |               |                 |               |                |               |                 |
| NaVid (Zhang et al., 2024a)      | 46.7          | 42.6           | 59.8          | 4.74            |               |                |               |                 | 43.8          | 39.0           | 60.1          | 4.89            |               |                |               |                 |
| StreamVLN (Wei et al., 2025)     | 15.8          | 10.8           | 52.2          | 8.48            | 32.4          | 28.2           | 49.3          | 5.43            | 22.0          | 16.0           | 60.9          | 7.24            | 44.2          | 39.0           | 59.3          | 4.43            |
| <b>Move-to-Anything (ours)</b>   | <b>62.5</b>   | <b>61.4</b>    | <b>69.1</b>   | <b>3.09</b>     | <b>70.6</b>   | <b>69.6</b>    | <b>75.8</b>   | <b>2.70</b>     | <b>60.6</b>   | <b>59.6</b>    | <b>67.6</b>   | <b>3.21</b>     | <b>71.4</b>   | <b>70.3</b>    | <b>76.3</b>   | <b>2.71</b>     |

Table 3: Comparison with previous methods on multi-step navigation task.

| Method                         | R-Nav         |                |               |                 | VLMB          |                |               |                 |
|--------------------------------|---------------|----------------|---------------|-----------------|---------------|----------------|---------------|-----------------|
|                                | SR $\uparrow$ | SPL $\uparrow$ | OS $\uparrow$ | NE $\downarrow$ | SR $\uparrow$ | SPL $\uparrow$ | OS $\uparrow$ | NE $\downarrow$ |
| StreamVLN (Wei et al., 2025)   | 11.5          | 2.36           | 50.4          | 10.3            | 20.4          | 5.25           | 61.9          | 10.26           |
| NaVid (Zhang et al., 2024a)    | 31.9          | 28.5           | 44.2          | 7.24            | 32.4          | 28.1           | 47.8          | 6.45            |
| <b>Move-to-Anything (ours)</b> | <b>36.3</b>   | <b>29.1</b>    | <b>54.9</b>   | <b>6.24</b>     | <b>35.4</b>   | <b>28.7</b>    | <b>53.1</b>   | <b>6.38</b>     |

## 5.2 MAIN RESULTS

We systematically evaluate general-purpose MLLMs, representative end-to-end VLN models, and our proposed method on single-step action execution tasks using the R-Nav and VLMB benchmarks, as shown in Table 2. **Our Move-to-Anything approach achieves SOTA performance on both benchmarks, demonstrating the effectiveness of the VLMB dataset in enhancing foundational navigation capabilities.**

To further validate the potential of Move-to-Anything in long-horizon tasks, we constructed a multi-step instruction evaluation set by composing single-step actions from VLMB using the method described in Section 3.2, Stage 3, as shown in Table 3. **Notably, our model outperforms existing SOTA models, despite never being trained on long-horizon instruction samples.** In contrast, most current SOTA models are trained on datasets specifically designed around long-horizon instruction paradigms. In contrast, most current SOTA models are trained on datasets specifically designed around long-horizon instruction paradigms.

## 5.3 VISUALIZATIONS

We recorded and visualized selected evaluation samples, as shown in Figure 5 and Appendix C. The results show that Move-to-Anything generalizes well to unseen environments and can execute VLN tasks based on navigation primitives. To illustrate this, we selected three representative VLMB instructions. The first captures spatial relationships among objects within a room. The second demonstrates precise localization of the target object, even in the presence of similar distractors and obstacles. The third highlights the model’s ability to utilize new semantic cues, such as the “glowing exit sign”, which were not included in the training set, but improved the accuracy of the target description.

We also demonstrate the model’s ability to complete complex tasks using multi-step instructions. The agent’s actual navigation trajectory does not always match the simulator’s shortest path, as the stopping point for receiving new instructions may not coincide with the predefined collection point. Nevertheless, the agent can still complete navigation tasks based on RGB observations and instructions. This suggests that models trained with navigation primitives exhibit enhanced scene understanding and planning capabilities. In contrast, traditional instruction paradigms often struggle when the agent’s observations do not match the instructions.

## 5.4 COMPARED IN R2R

We have verified that the compact dataset proposed in this paper effectively enhances the model’s fundamental navigation skills. To further validate the contribution of the VLMB dataset to navigation capability, we conducted joint training using VLMB together with R2R and RxR datasets—even

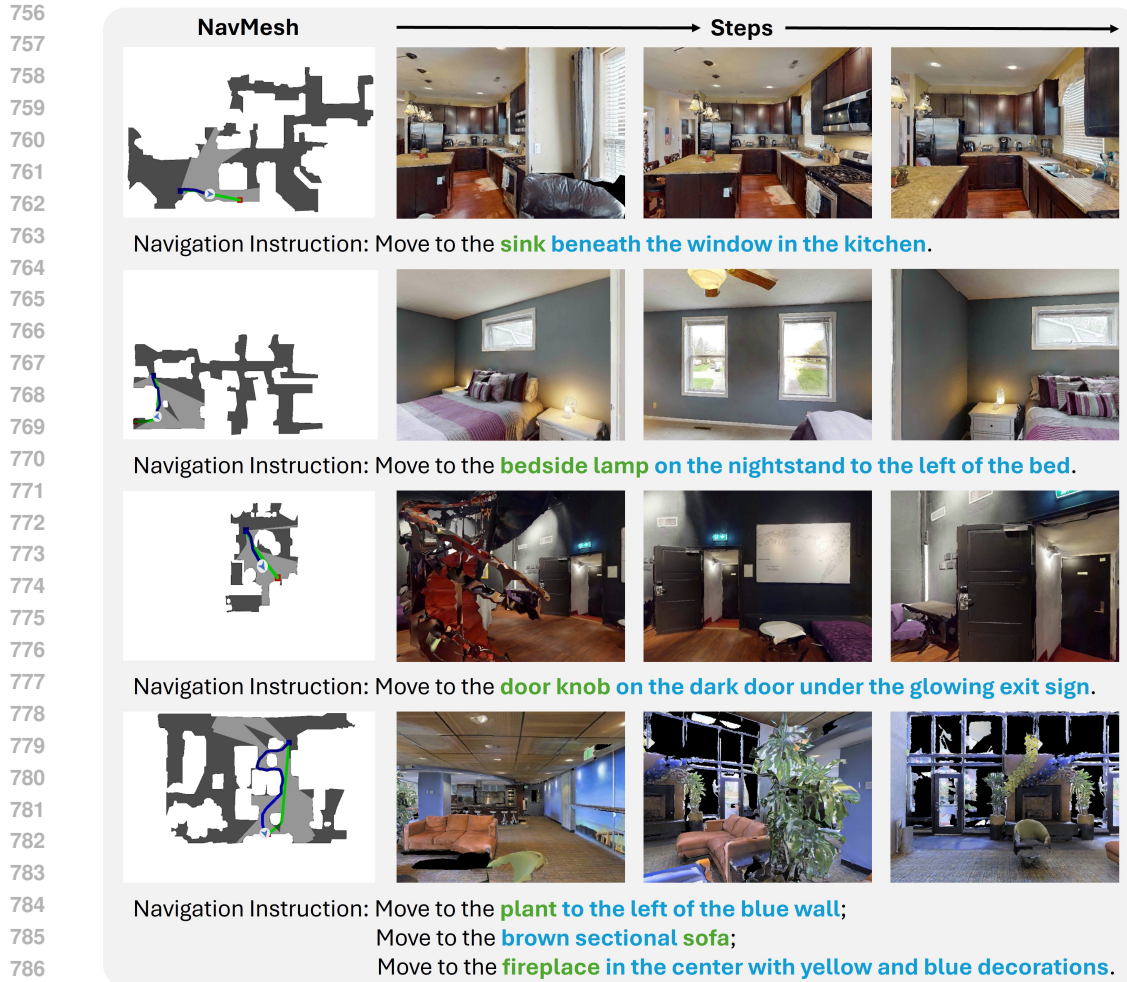

788 Figure 5: Examples of visualized trajectories and observed images. In the navigation mesh  
789 (NavMesh), the color **green** denotes the reference path, while **blue** indicates the path taken by  
790 the agent.  
791

792 Table 4: Comparison with SOTA methods on VLN-CE R2R Val-Unseen split.  
793

794

| Method                       | Traning Dataset | External Data | R2R Val-Unseen |                |               |                 |
|------------------------------|-----------------|---------------|----------------|----------------|---------------|-----------------|
|                              |                 |               | SR $\uparrow$  | SPL $\uparrow$ | OS $\uparrow$ | NE $\downarrow$ |
| NaVid (Zhang et al., 2024a)  | R2R+RxR+VLNdata | 953K          | 37.4           | 25.9           | 49.1          | 5.47            |
| StreamVLN (Wei et al., 2025) | R2R+RxR+EnvDrop | 10033K        | 45.5           | 41.6           | 53.8          | 6.05            |
| Move-to-Anything* (ours)     | R2R+RxR         | 0k            | 33.6           | 30.1           | 43.1          | 7.00            |
| Move-to-Anything (ours)      | R2R+RxR+VLMB    | 40K           | 38.0 (+4.4)    | 34.5 (+4.4)    | 43.2 (+0.1)   | 6.45 (-0.55)    |

795

796

797

798

799

800 though we maintain that the instruction composition of R2R alone is insufficient for equipping mod-  
801 els with general navigation competence. **Experimental results show that by incorporating even**  
802 **a small amount of VLMB data during joint training, the model achieves higher performance**  
803 **levels on R2R, demonstrating the usefulness and effectiveness of the VLMB dataset.** In Ap-  
804 pendix B.2, we present a detailed comparison of the model’s training duration and inference time.  
805

## 806 5.5 ABLATION STUDIES

807

808 To validate the effectiveness of our dataset construction and model improvements, we conducted  
809 ablation studies as shown in Table 5. In the initial stage of automated goal-oriented object sampling  
for VLMB, we collected 30,000 samples. Through rigorous cross-validation and filtering with a

Table 5: Ablation studies on dataset cross-validation and model improvements.

| Method                           | R-Nav       |             |             |             |             |             |             |             | VLMB        |             |             |             |             |             |             |             |
|----------------------------------|-------------|-------------|-------------|-------------|-------------|-------------|-------------|-------------|-------------|-------------|-------------|-------------|-------------|-------------|-------------|-------------|
|                                  | MP3D        |             |             |             | HM3D        |             |             |             | MP3D        |             |             |             | HM3D        |             |             |             |
|                                  | SR↑         | SPL↑        | OS↑         | NE↓         | SR↑         | SPL↑        | OS↑         | NE↓         | SR↑         | SPL↑        | OS↑         | NE↓         | SR↑         | SPL↑        | OS↑         | NE↓         |
| w/o cross validation of datasets | 55.7        | 54.0        | 64.6        | 3.45        | 67.3        | 66.0        | 75.3        | 2.89        | 54.0        | 52.6        | 63.1        | 3.53        | 67.8        | 66.2        | 75.6        | 2.84        |
| w/o HM and TSE                   | 57.6        | 56.5        | 67.1        | 3.43        | 66.3        | 65.3        | 73.7        | 2.84        | 58.9        | 57.7        | 67.1        | 3.32        | 66.0        | 64.9        | 73.3        | 2.86        |
| w/o TSE                          | 59.4        | 58.1        | 68.3        | 3.34        | 68.2        | 68.4        | 74.2        | 2.89        | 59.3        | 58.3        | 67.5        | 3.25        | 68.1        | 66.5        | 74.1        | 2.80        |
| <b>Move-to-Anything (ours)</b>   | <b>62.5</b> | <b>61.4</b> | <b>69.1</b> | <b>3.09</b> | <b>70.6</b> | <b>69.6</b> | <b>75.8</b> | <b>2.70</b> | <b>60.6</b> | <b>59.6</b> | <b>67.6</b> | <b>3.21</b> | <b>71.4</b> | <b>70.3</b> | <b>76.3</b> | <b>2.71</b> |

Table 6: Ablation study on HM configuration: impact of short-term window size ( $W$ ), long-term memory slots ( $M$ ), and aggregation method.

| W  | M     | Aggregator Type | VLMB        |             |             |             |             |             |             |             |
|----|-------|-----------------|-------------|-------------|-------------|-------------|-------------|-------------|-------------|-------------|
|    |       |                 | MP3D        |             |             |             | HM3D        |             |             |             |
|    |       |                 | SR↑         | SPL↑        | OS↑         | NE↓         | SR↑         | SPL↑        | OS↑         | NE↓         |
| 4  | 784   | Mean+MLP        | 53.2        | 51.8        | 60.3        | 3.78        | 64.7        | 63.1        | 69.2        | 3.12        |
| 8  | 784   |                 | 57.1        | 55.7        | 64.4        | 3.45        | 68.9        | 67.5        | 73.4        | 2.89        |
| 8  | 1,568 |                 | <b>60.6</b> | <b>59.6</b> | <b>67.6</b> | <b>3.21</b> | <b>71.4</b> | <b>70.3</b> | <b>76.3</b> | <b>2.71</b> |
| 16 | 1,568 |                 | 58.8        | 57.9        | 65.9        | 3.38        | 70.6        | 69.4        | 75.1        | 2.74        |
| 8  | 1,568 | N/A             | 57.7        | 56.5        | 64.2        | 3.40        | 68.9        | 67.6        | 73.8        | 3.01        |

large model, we retained 15,000 high-quality samples. **This strategy not only halved the dataset size but also led to a significant improvement in model performance, demonstrating the value of our data selection process.** Furthermore, the two lightweight modules proposed in this work, hierarchical memory (HM) and temporal & segment embeddings (TSE), demonstrated significant effectiveness in ablation studies. These modules enhance the model’s ability to capture temporal dependencies, thereby improving its adaptability to navigation tasks.

We performed ablation experiments on the parameter settings within the HM module. Table 6 reports results when varying the short-term window size and the number of long-term memory slots, and compares our default mean+MLP aggregation strategy with a no-aggregation baseline. **Results show that increasing both  $W$  and  $M$  improves navigation performance up to an optimal configuration ( $W=8$ ,  $M=1568$ ), while the mean+MLP aggregator achieves a favorable balance between hierarchical memory preservation and computational efficiency.**

## 6 CONCLUSION

This work identifies a key weakness in current end-to-end VLN systems: although they perform well on long-horizon navigation, they struggle with basic navigation primitives. To this end, we introduce VLMB, the first dataset specifically designed to enhance the fundamental navigation capabilities of end-to-end VLN systems. Centered around the “move-to” navigation primitive, VLMB constructs a complete training set and evaluation benchmark through MLLM-based spatial and semantic augmentation, enabling controllable composition of these primitives. Experiments show that our proposed VLMB dataset and hierarchical memory design offer a principled approach to equipping general-purpose MLLMs with reliable navigation capabilities. Overall, we present a scalable, step-by-step training paradigm that helps general-purpose MLLMs acquire reliable foundational skills for VLN applications.

## ETHICS STATEMENT

This work does not involve human subjects, sensitive personal data, or practices that raise privacy or security concerns. We have taken care to avoid introducing or amplifying bias or discrimination in our models and datasets. No conflicts of interest or sponsorship-related influences have affected the research process or outcomes. We remain committed to upholding ethical standards throughout the submission, review, and discussion phases of the ICLR conference.

864 REPRODUCIBILITY STATEMENT

865  
866 We are committed to the transparency and reproducibility of our findings. The code and datasets will  
867 be made publicly available to the research community, enabling others to reproduce, verify, and build  
868 upon our work. Additionally, to ensure reproducibility, we have also provided detailed descriptions  
869 of the dataset configuration pipeline in the Appendix. The link to the anonymous repository is as  
870 follows: [https://anonymous.4open.science/r/move\\_to\\_anything-4E1F](https://anonymous.4open.science/r/move_to_anything-4E1F).

871  
872 REFERENCES

- 873  
874 Peter Anderson, Qi Wu, Damien Teney, Jake Bruce, Mark Johnson, Niko Sünderhauf, Ian Reid,  
875 Stephen Gould, and Anton Van Den Hengel. Vision-and-language navigation: Interpreting  
876 visually-grounded navigation instructions in real environments. In *Proceedings of the IEEE con-*  
877 *ference on computer vision and pattern recognition*, pp. 3674–3683, 2018.
- 878 Wenzhe Cai, Siyuan Huang, Guangran Cheng, Yuxing Long, Peng Gao, Changyin Sun, and Hao  
879 Dong. Bridging zero-shot object navigation and foundation models through pixel-guided navi-  
880 gation skill. In *Proceedings of IEEE International Conference on Robotics and Automation*, pp.  
881 5228–5234. IEEE, 2024.
- 882 Angel Chang, Angela Dai, Thomas Funkhouser, Maciej Halber, Matthias Niessner, Manolis Savva,  
883 Shuran Song, Andy Zeng, and Yinda Zhang. Matterport3d: Learning from rgb-d data in indoor  
884 environments. *arXiv preprint arXiv:1709.06158*, 2017.
- 885 Matthew Chang, Theophile Gervet, Mukul Khanna, Sriram Yenamandra, Dhruv Shah, So Yeon  
886 Min, Kavitha Shah, Chris Paxton, Saurabh Gupta, Dhruv Batra, et al. Goat: Go to any thing. *arXiv*  
887 *preprint arXiv:2311.06430*, 2023.
- 888 Jiaqi Chen, Bingqian Lin, Ran Xu, Zhenhua Chai, Xiaodan Liang, and Kwan-Yee K Wong. Mapgpt:  
889 Map-guided prompting with adaptive path planning for vision-and-language navigation. *arXiv*  
890 *preprint arXiv:2401.07314*, 2024.
- 891 Peihao Chen, Dongyu Ji, Kunyang Lin, Runhao Zeng, Thomas Li, Mingkui Tan, and Chuang Gan.  
892 Weakly-supervised multi-granularity map learning for vision-and-language navigation. *Advances*  
893 *in Neural Information Processing Systems*, 35:38149–38161, 2022a.
- 894 Peihao Chen, Xinyu Sun, Hongyan Zhi, Runhao Zeng, Thomas H Li, Gaowen Liu, Mingkui Tan, and  
895 Chuang Gan.  $\alpha^2$  nav: Action-aware zero-shot robot navigation by exploiting vision-and-language  
896 ability of foundation models. *arXiv preprint arXiv:2308.07997*, 2023.
- 897 Shizhe Chen, Pierre-Louis Guhur, Cordelia Schmid, and Ivan Laptev. History aware multimodal  
898 transformer for vision-and-language navigation. *Advances in Neural Information Processing Sys-*  
899 *tems*, 34:5834–5847, 2021.
- 900 Shizhe Chen, Pierre-Louis Guhur, Makarand Tapaswi, Cordelia Schmid, and Ivan Laptev. Think  
901 global, act local: Dual-scale graph transformer for vision-and-language navigation. In *Pro-*  
902 *ceedings of the IEEE/CVF Conference on Computer Vision and Pattern Recognition*, pp. 16537–  
903 16547, 2022b.
- 904 An-Chieh Cheng, Yandong Ji, Zhaojing Yang, Xueyan Zou, Jan Kautz, Erdem Biyik, Hongxu Yin,  
905 Sifei Liu, and Xiaolong Wang. Navila: Legged robot vision-language-action model for naviga-  
906 tion. In *Proceedings of Robotics: Science and Systems*, 2025.
- 907 Haodong Hong, Yanyuan Qiao, Sen Wang, Jiajun Liu, and Qi Wu. General scene adaptation for  
908 vision-and-language navigation. *arXiv preprint arXiv:2501.17403*, 2025.
- 909 Jacob Krantz, Erik Wijmans, Arjun Majumdar, Dhruv Batra, and Stefan Lee. Beyond the nav-  
910 graph: Vision-and-language navigation in continuous environments. In *Proceedings of European*  
911 *Conference on Computer Vision*, pp. 104–120. Springer, 2020.
- 912 Alexander Ku, Peter Anderson, Roma Patel, Eugene Ie, and Jason Baldridge. Room-across-room:  
913 Multilingual vision-and-language navigation with dense spatiotemporal grounding. *arXiv preprint*  
914 *arXiv:2010.07954*, 2020.

- 918 Bin Lin, Yang Ye, Bin Zhu, Jiayi Cui, Munan Ning, Peng Jin, and Li Yuan. Video-llava: Learning  
919 united visual representation by alignment before projection. In *Proceedings of Empirical Methods*  
920 *in Natural Language Processing*, 2024.
- 921
- 922 Yuxing Long, Wenzhe Cai, Hongcheng Wang, Guanqi Zhan, and Hao Dong. Instructnav: Zero-  
923 shot system for generic instruction navigation in unexplored environment. *arXiv preprint*  
924 *arXiv:2406.04882*, 2024.
- 925 Tianyi Ma, Yue Zhang, Zehao Wang, and Parisa Kordjamshidi. Breaking down and building up:  
926 Mixture of skill-based vision-and-language navigation agents. *arXiv preprint arXiv:2508.07642*,  
927 2025.
- 928
- 929 Santhosh K Ramakrishnan, Aaron Gokaslan, Erik Wijmans, Oleksandr Maksymets, Alex Clegg,  
930 John Turner, Eric Undersander, Wojciech Galuba, Andrew Westbury, Angel X Chang, et al.  
931 Habitat-matterport 3d dataset (hm3d): 1000 large-scale 3d environments for embodied ai. *arXiv*  
932 *preprint arXiv:2109.08238*, 2021.
- 933 Hao Tan, Licheng Yu, and Mohit Bansal. Learning to navigate unseen environments: Back transla-  
934 tion with environmental dropout. In *Proceedings of the 2019 Conference of the North*, 2019.
- 935
- 936 Qwen Team. Qwen2 technical report. *arXiv preprint arXiv:2407.10671*, 2024.
- 937
- 938 Karan Wanchoo, Xiaoye Zuo, Hannah Gonzalez, Soham Dan, Georgios Georgakis, Dan Roth,  
939 Kostas Daniilidis, and Eleni Miltsakaki. Navcon: A cognitively inspired and linguistically  
940 grounded corpus for vision and language navigation. *arXiv preprint arXiv:2412.13026*, 2024.
- 941
- 942 Meng Wei, Chenyang Wan, Xiqian Yu, Tai Wang, Yuqiang Yang, Xiaohan Mao, Chenming Zhu,  
943 Wenzhe Cai, Hanqing Wang, Yilun Chen, et al. Streamvln: Streaming vision-and-language navi-  
944 gation via slowfast context modeling. *arXiv preprint arXiv:2507.05240*, 2025.
- 945
- 946 Hang Yin, Xiuwei Xu, Linqing Zhao, Ziwei Wang, Jie Zhou, and Jiwen Lu. Unigoal: Towards  
947 universal zero-shot goal-oriented navigation. In *Proceedings of the Computer Vision and Pattern*  
948 *Recognition Conference*, pp. 19057–19066, 2025.
- 949
- 950 Naoki Yokoyama, Sehoon Ha, Dhruv Batra, Jiuguang Wang, and Bernadette Bucher. Vlfm: Vision-  
951 language frontier maps for zero-shot semantic navigation. In *Proceedings of the IEEE Interna-*  
952 *tional Conference on Robotics and Automation*, pp. 42–48. IEEE, 2024a.
- 953
- 954 Naoki Yokoyama, Ram Ramrakhya, Abhishek Das, Dhruv Batra, and Sehoon Ha. Hm3d-ovon: A  
955 dataset and benchmark for open-vocabulary object goal navigation. In *Proceedings of IEEE/RSJ*  
956 *International Conference on Intelligent Robots and Systems*, pp. 5543–5550. IEEE, 2024b.
- 957
- 958 X Zhai, B Mustafa, A Kolesnikov, and L Beyer. Siglip: Sigmoid loss for language image pre-  
959 training. *arXiv preprint arXiv:2303.15343*, 2023.
- 960
- 961 Jiazhao Zhang, Kunyu Wang, Rongtao Xu, Gengze Zhou, Yicong Hong, Xiaomeng Fang, Qi Wu,  
962 Zhizheng Zhang, and He Wang. Navid: Video-based VLM plans the next step for vision-and-  
963 language navigation. In *Proceedings of Robotics: Science and Systems*, 2024a.
- 964
- 965 Jiazhao Zhang, Kunyu Wang, Shaoan Wang, Minghan Li, Haoran Liu, Songlin Wei, Zhongyuan  
966 Wang, Zhizheng Zhang, and He Wang. Uni-navid: A video-based vision-language-action model  
967 for unifying embodied navigation tasks. In *Proceedings of Robotics: Science and Systems*, 2025a.
- 968
- 969 Lingfeng Zhang, Xiaoshuai Hao, Yingbo Tang, Haoxiang Fu, Xinyu Zheng, Pengwei Wang,  
970 Zhongyuan Wang, Wenbo Ding, and Shanghang Zhang. *navā3*: Understanding any instruction,  
971 navigating anywhere, finding anything. *arXiv preprint arXiv:2508.04598*, 2025b.
- 972
- 973 Yuanhan Zhang, Bo Li, Haotian Liu, Yong Jae Lee, Liangke Gui, Di Fu, Jiashi Feng, Ziwei  
974 Liu, and Chunyuan Li. Llava-next: A strong zero-shot video understanding model. <https://llava-vl.github.io/blog/2024-04-30-llava-next-video/>, 2024b.
- 975
- 976 Yuanhan Zhang, Jinming Wu, Wei Li, Bo Li, Zejun Ma, Ziwei Liu, and Chunyuan Li. Video  
977 instruction tuning with synthetic data. *arXiv preprint arXiv:2410.02713*, 2024c.

972 Duo Zheng, Shijia Huang, Lin Zhao, Yiwu Zhong, and Liwei Wang. Towards learning a generalist  
973 model for embodied navigation. In *Proceedings of the IEEE/CVF Conference on Computer Vision  
974 and Pattern Recognition*, pp. 13624–13634, 2024.

975  
976 Gengze Zhou, Yicong Hong, and Qi Wu. Navgpt: Explicit reasoning in vision-and-language naviga-  
977 tion with large language models. In *Proceedings of the AAAI Conference on Artificial Intelligence*,  
978 volume 38, pp. 7641–7649, 2024.

979  
980  
981  
982  
983  
984  
985  
986  
987  
988  
989  
990  
991  
992  
993  
994  
995  
996  
997  
998  
999  
1000  
1001  
1002  
1003  
1004  
1005  
1006  
1007  
1008  
1009  
1010  
1011  
1012  
1013  
1014  
1015  
1016  
1017  
1018  
1019  
1020  
1021  
1022  
1023  
1024  
1025

## 1026 A DATASET CONSTRUCTION

### 1027 A.1 RULE SETTING

1028 Let  $S$  denote the semantic segmentation observation,  $p_a$  the current agent position, and  $\mathcal{O}$  the scene  
 1031 objects indexed by semantic IDs. We first form the set of visible IDs  $\mathcal{I} = \text{unique}(S) \setminus \{0\}$  and  
 1032 define the candidate set

$$1033 \mathcal{V} = \left\{ o \in \mathcal{O} \mid \text{id}(o) \in \mathcal{I}, \text{cat}(o) \notin \mathcal{U}, \text{cat}(o) \neq \emptyset, d(o) = \text{dist}_g(p_a, p_o) < \infty \right\},$$

1035 where  $\mathcal{U}$  is the excluded category set (e.g., wall, floor, ceiling),  $p_o$  is the OBB center of  $o$ , and  $\text{dist}_g$   
 1036 is the simulator geodesic distance. We retain objects whose category occurs exactly once in view,  
 1037

$$1038 \mathcal{V}_{\text{uniq}} = \left\{ o \in \mathcal{V} \mid |\{o' \in \mathcal{V} : \text{cat}(o') = \text{cat}(o)\}| = 1 \right\},$$

1040 and apply a distance filter

$$1042 \mathcal{V}_d = \{ o \in \mathcal{V}_{\text{uniq}} \mid 3.0 \leq d(o) \leq 10.0 \}.$$

1043 If  $\mathcal{V}_d \neq \emptyset$ , we sample  $o^* \sim \text{Unif}(\mathcal{V}_d)$ , snap its position to the navigation mesh  $p^* = \text{snap}(p_o^*)$ , and  
 1044 abort if snapping fails. A shortest-path follower with goal radius  $r = 3$  m and step cap  $T = 150$   
 1045 is used to navigate from the current pose to  $p^*$ . Success is declared iff there exists  $t \in \{1, \dots, T\}$   
 1046 such that  $\text{dist}_g(p_t, p^*) \leq r$ , where  $p_t$  is the agent position at step  $t$ . Upon success, we persist the  
 1047 sample with the command “move to the  $\text{cat}(o^*)$ ”, a fixed-length (100) placeholder token sequence,  
 1048 the reference path, and navigation metadata; otherwise, the sample is discarded. For a chained  
 1049 collection with  $N$  segments (no reset), the procedure is repeated per segment; segment commands  
 1050 are concatenated with semicolons, reference paths are concatenated, geodesic distances are summed,  
 1051 and the first RGB frame of each segment is recorded. The episode is valid only if all segments  
 1052 succeed.

### 1054 A.2 PROMPT DEFINITIONS

#### 1055 SYSTEM PROMPT

1057 You are a precise instruction rewriter for a mobile robot. You receive: (1) a base  
 1058 movement instruction string, (2) an image. Output exactly ONE short, executable  
 1059 movement command that keeps the same target and intent as the base instruction,  
 1060 and, when possible, enrich it using ONLY details clearly observed in the image.

#### 1061 **Hard rules:**

- 1062 • The final command must remain aligned with the original target (do not  
 1063 change what to move).
- 1064 • Do NOT invent or guess details that are not visible in the image.
- 1065 • Avoid uncertainty words (e.g., maybe, probably, around, approximately,  
 1066 seems).
- 1067 • Output exactly one sentence, no explanations, no lists.
- 1068 • If the target object is NOT visible anywhere in the image, output exactly: I  
 1069 can't move to there
- 1070 • If the target object IS visible but you cannot confidently add details, output  
 1071 the base instruction unchanged.

#### 1072 **Description styles (choose based on what is visible):**

- 1073 • **Spatial relation:** use clear relative positions with salient anchors (e.g.,  
 1074 left/right/front/behind: “move to the chair to the left of the table”).
- 1075 • **Semantic attributes:** use clear attributes like color/material/type (e.g.,  
 1076 “move to the green sofa”).

1077  
 1078 Pick the style that yields the most explicit single-sentence command; if both are  
 1079 obvious and concise, you may combine them briefly.

## 1080 USER PROMPT (EXAMPLE)

1081 Base instruction: move to the table

1082 Using ONLY what is visible in the image, produce ONE precise, executable com-  
 1083 mand that preserves the same target. Prefer either a spatial-relation description or  
 1084 a semantic-attribute description based on what is clearly visible. If the target ob-  
 1085 ject is not visible at all, reply exactly: *i cant move to there*. If the target  
 1086 object is visible but you cannot confidently add details, repeat the base instruction  
 1087 unchanged.  
 1088

### 1089 A.3 DATASET CONSTRUCTION PIPELINE

1090  
 1091 Through a two-stage sampling and optimization process, we can automatically construct the VLMB  
 1092 dataset. Figure 6 shows the instruction information and the first-frame RGB observation image  
 1093 after adding semantic and spatial descriptions. It can be observed that the large model enriches  
 1094 the original “move to the object” command by adding a series of details such as orientation, facing  
 1095 direction, color, and material. The descriptive dimensions for the target are expanded, and the  
 1096 relationships between objects are also introduced, thereby enhancing the model’s understanding of  
 1097 the scene. This, in turn, improves its ability to localize the target and boosts overall navigation  
 1098 performance. This pipeline also effectively filters out incorrectly labeled images from the collector,  
 1099 as shown in Figure 7. In addition to inherent annotation errors from the simulator, these images  
 1100 include unreachable targets such as ceiling lamps, as well as objects that are difficult to identify in  
 1101 the observation images. This step helps prevent the generation of erroneous training data. Similarly,  
 1102 we apply the same filtering strategy to the evaluation data to ensure the validity of the evaluation.  
 1103

## 1104 B COMPARISON WITH EXISTING METHOD

### 1105 B.1 COMPARISON WITH EXISTING VLN DATASET

1106  
 1107 Most existing VLN datasets are derived from VLN-CE (R2R and RxR), with model training and  
 1108 evaluation primarily conducted on these corpora. We categorize R2R/RxR instructions into four  
 1109 common navigation primitives based on their functional semantics: *move* (direct displacement  
 1110 without turning or crossing region boundaries), *situation* (pure contextual descriptions without  
 1111 explicit action requests), *change region* (crossing spatial boundaries or switching areas, e.g.,  
 1112 entering/leaving rooms or floors), and *change direction* (orientation changes such as turn-  
 1113 ing left/right without necessary displacement). Although VLN-CE instructions are often verbose  
 1114 and compositional, their clauses can be reliably mapped to these four types. Consequently, R-Nav  
 1115 (move-to-object) is extensively represented within VLN-CE, functioning as its subset and effectively  
 1116 serving as a structural simplification of VLN-CE’s complex instructions. Automated classification  
 1117 using GPT-4o, and manual verification, we obtained the proportions presented in Table 7, where  
 1118 *move* accounts for the largest share. Importantly, *move-to* (our operationalization of *move*) is  
 1119 closest to human navigation phrasing and is the easiest to construct at scale. By semantically and  
 1120 spatially extending *move-to*, we subsume most *situation* statements and *change region*  
 1121 transitions, and optionally pair with minimal *change direction* tokens when orientation is re-  
 1122 quired. For example, a *change region* instruction such as “*walk towards the bathroom*” can be  
 1123 expressed using *move-to*, and a *situation* instruction like “*wait in the doorway of the dining*  
 1124 *room*” can similarly be represented within the *move-to* framework. Building on these observa-  
 1125 tions, we constructed VLMB.

### 1126 Limitations of VLN-CE

- 1127
- 1128 • **Limited scene diversity and semantics.** Both datasets are confined to MP3D with only  
 1129 61 training scenes focused on indoor home settings; semantic annotations cover merely 21  
 1130 categories, constraining generalization of end-to-end models.
- 1131 • **Lack of foundational capabilities.** Classical modular systems (with maps/localization)  
 1132 can reliably reach targets within the field of view, whereas general end-to-end models typi-  
 1133 cally cannot. The community often overlooks that stable path planning is more fundamental  
 than instruction following, leading to brittle behaviors.

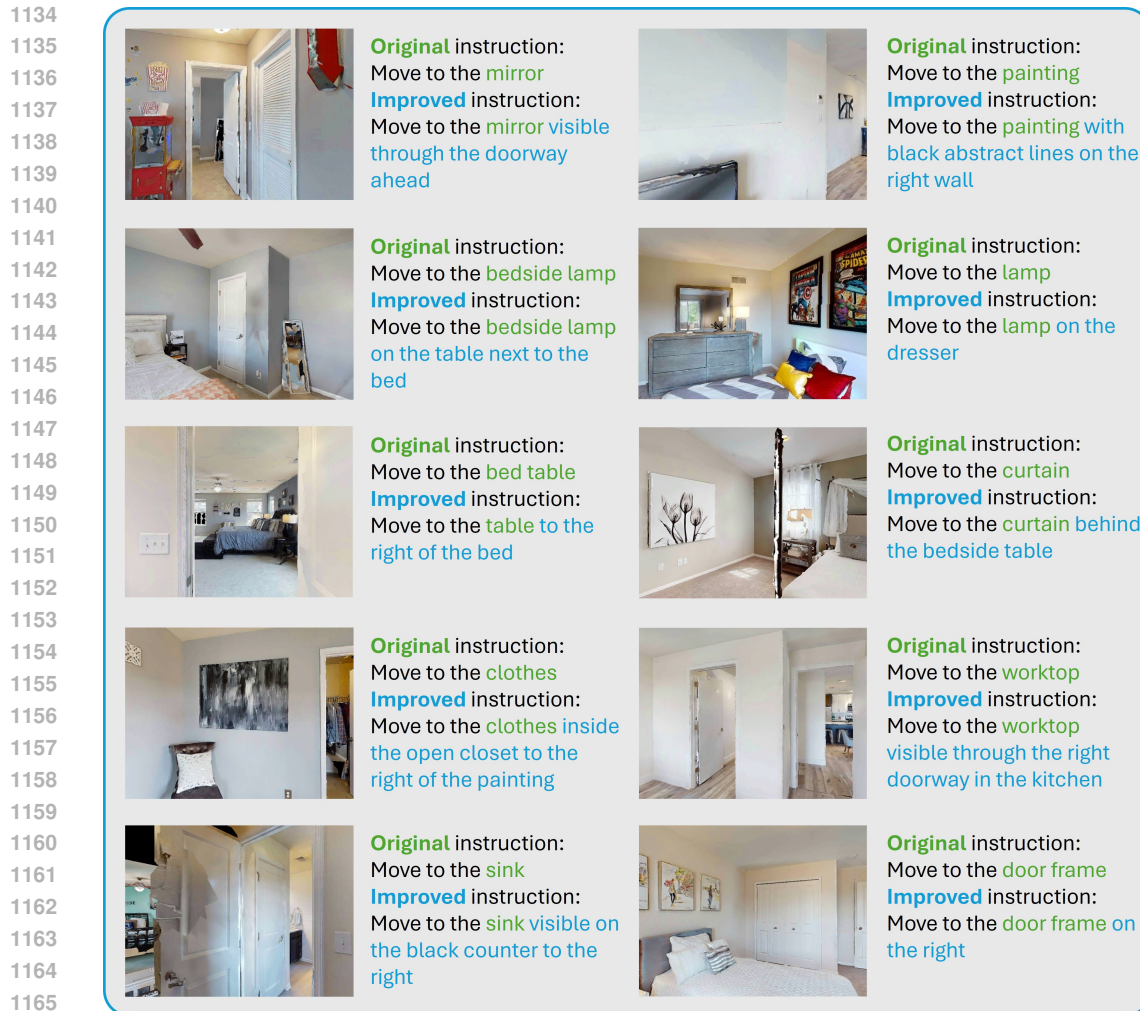

Figure 6: Examples of refined instructions and RGB observations after semantic and spatial augmentation.

- **Unstructured instruction design.** Current instructions do not support step-wise execution or timely intervention, obscuring failure points and hindering robust control for complex tasks.

### VLMB: Targeted Improvements

- **Enhanced scene and semantic diversity.** VLMB includes 206 training scenes and 873 instances; with large-model annotations, the effective semantic categories and spatial relations are substantially richer.
- **Primitive-level analysis and training.** We find that 42% of R2R instructions can be abstracted into `move`. We explicitly train/evaluate this capability, which—though seemingly simple—requires target understanding/localization, path planning, and stop decisions.
- **Multi-step, controllable instruction construction.** By enriching `move` and composing multi-step commands, VLMB supports long-range controllable navigation with stage-wise monitoring and intervention, enabling recovery after localized failures.

1188  
1189  
1190  
1191  
1192  
1193  
1194  
1195  
1196  
1197  
1198  
1199  
1200  
1201  
1202  
1203  
1204  
1205  
1206  
1207  
1208  
1209  
1210  
1211  
1212  
1213  
1214  
1215  
1216  
1217  
1218  
1219  
1220  
1221  
1222  
1223  
1224  
1225  
1226  
1227  
1228  
1229  
1230  
1231  
1232  
1233  
1234  
1235  
1236  
1237  
1238  
1239  
1240  
1241

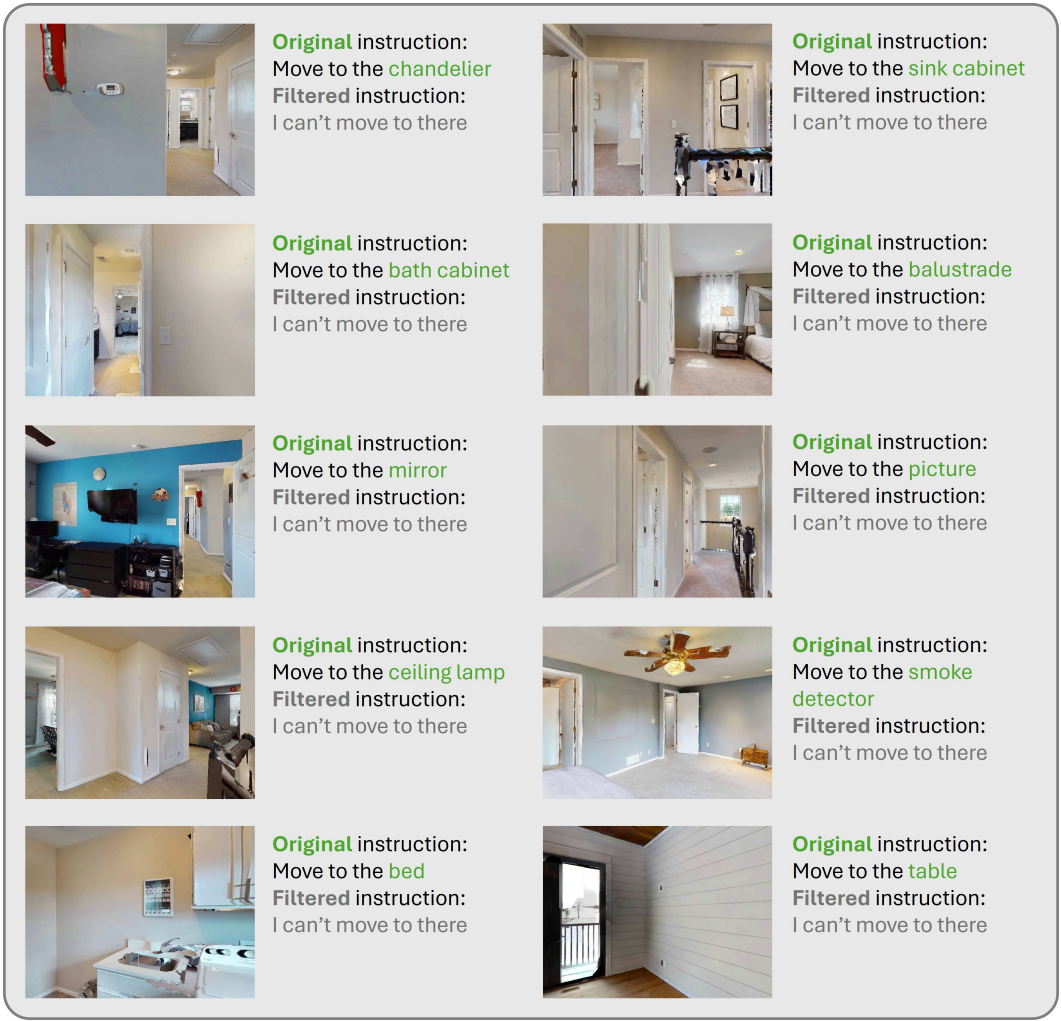

Figure 7: Examples of incorrectly labeled images filtered out by the pipeline.

Table 7: Proportions of common navigation primitive types.

| Navigation Primitive | Instruction Numbers | Percentage |
|----------------------|---------------------|------------|
| Move                 | 227,189             | 42%        |
| Situation            | 200,143             | 37%        |
| Change Direction     | 70,320              | 13%        |
| Change Region        | 43,274              | 8%         |

B.2 COMPARISON WITH EXISTING VLN MODEL

We conducted a visual case study of the navigation trajectories and ego-observations of existing SOTA models on the R2R dataset. Our analysis of two successfully labeled cases (Figure 8) reveals critical issues: in the first case, the navigation model initially moves in the complete opposite direction of the instruction, eventually reaching the goal after a circular detour. Although labeled as successful, the model clearly demonstrates navigational disorientation. In the second case, despite explicit instructions to *stop at the first entrance*, the model terminates at an incorrect location. These cases reveal substantial randomness in the model’s success criteria, model can reach the target even when completely ignoring instructions from the outset. This fundamentally contradicts the purpose of instruction-following navigation. We attribute these errors to the training paradigm where mod-

Table 8: Training and inference comparison across models.

| Method                  | Traning dataset | Dataset size | Traning time (GPU hours) | Inference time (s) |        |
|-------------------------|-----------------|--------------|--------------------------|--------------------|--------|
|                         |                 |              |                          | R2R                | VLMB   |
| NaVid                   | R2R+RxR+VLNdata | 953K         | 672                      | 7.9638             | /      |
| StreamVLN               | R2R+RxR+EnvDrop | 10033K       | 1500                     | 8.3288             | /      |
| Move-to-Anything (ours) | VLMB            | 40K          | 76                       | /                  | 3.0852 |

els are exposed to repetitive samples with ambiguous instructions, causing MLLMs to overfit to spurious vision-language correlations rather than learning genuine navigation skills.

A quantitative comparison of the training dataset scale, training duration, and inference time between Move-to-Anything and existing SOTA models is presented in Table 8. Both training and inference were conducted on NVIDIA A100 GPUs. The training utilized  $4 \times 80$  GB A100 cards, with a total memory footprint of 285 GB, and the training duration was reported in terms of A100 GPU hours. For inference, the memory consumption was approximately 30 GB, and the reported inference time corresponds to the complete instruction-response cycle. **As evidenced by the results, our Move-to-Anything model requires substantially fewer training samples compared to conventional SOTA approaches. Furthermore, benefiting from its streamlined instruction format, our method achieves significantly faster inference speed than existing models.**

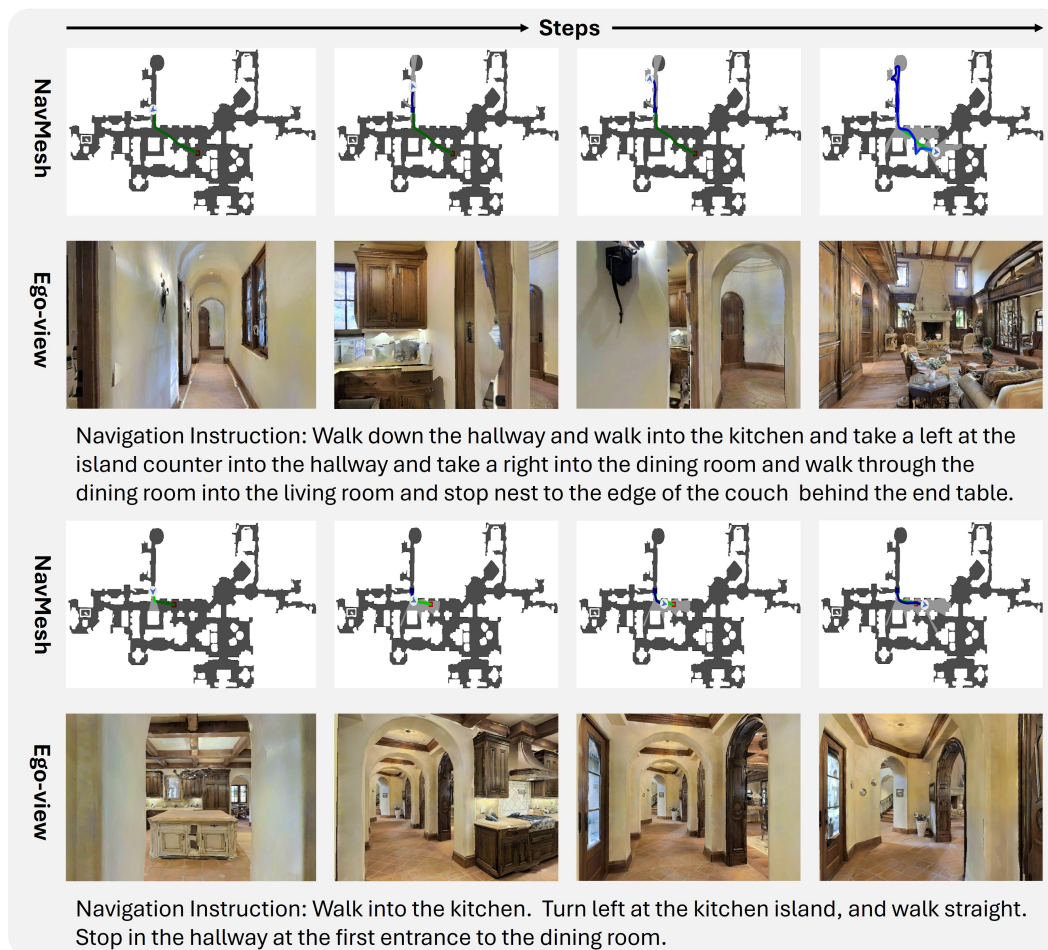

Figure 8: Visualization of successful samples in R2R. In the navigation mesh (NavMesh), the color green denotes the reference path, while blue indicates the actual path taken by the agent.

## C VISUALIZATION RESULTS

We selected a subset of samples from the HM3D scenes for visualization, as shown in Figure 9. These samples include various spatial and semantic characteristics: directional relations (e.g., *on the left side of the room*), regional cues (e.g., *visible through the doorway straight ahead*), objects located at the edge of the observation field (often easily overlooked), and region containment relations (e.g., *in the kitchen*). Together, these examples represent a broad range of spatial and semantic information commonly encountered in navigation tasks.

We further visualize samples from multi-step instruction navigation tasks, as shown in Figure 10. In some cases, a noticeable gap exists between the actual navigation path taken by the agent and the optimal path generated by the simulator. This observation suggests that the model is not merely memorizing predefined routes but instead demonstrates a certain level of path planning capability. These results support the effectiveness of the navigation primitive-based paradigm in building general-purpose navigation systems.

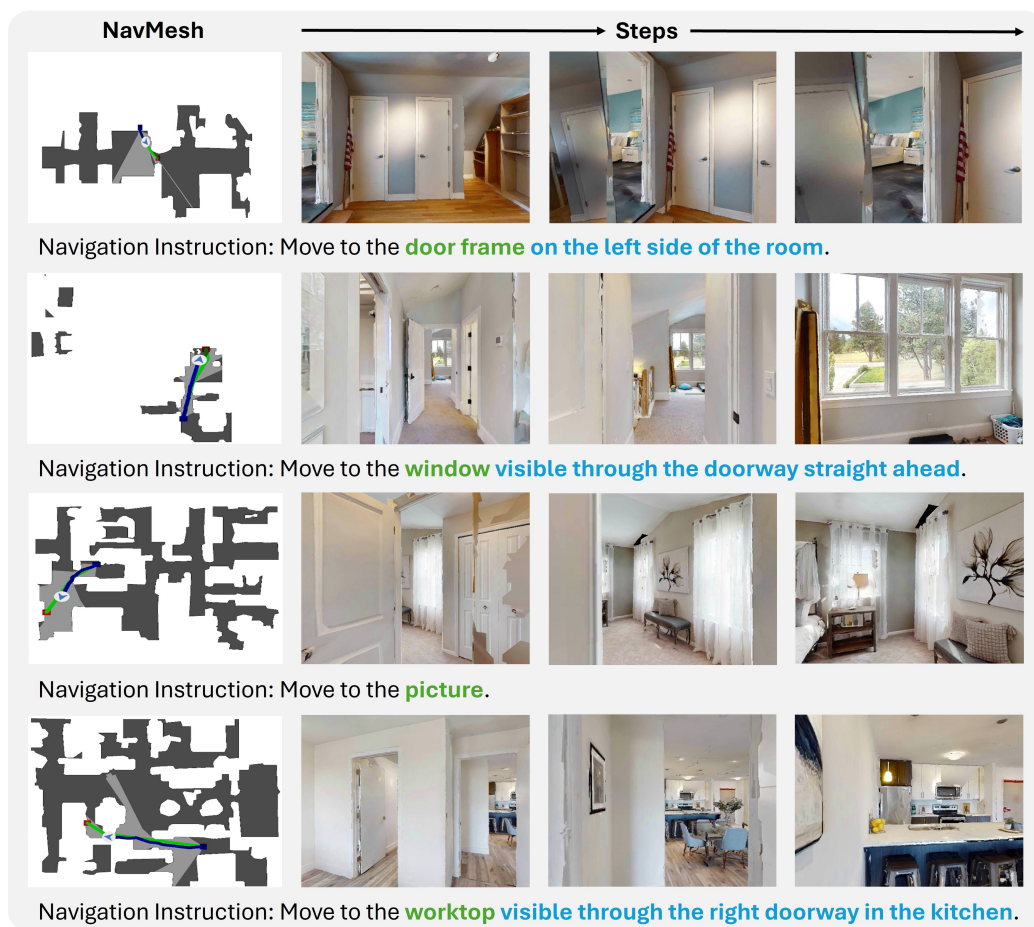

Figure 9: Examples of visualized trajectories and observed images in HM3D.

## D USE OF LARGE LANGUAGE MODELS (LLMs)

We used Large Language Models (LLMs) in two limited ways: (1) ChatGPT was employed to polish the language and improve clarity of the manuscript; (2) During dataset construction, ChatGPT assisted in generating candidate instructions and validating specific annotation steps under human supervision. All outputs were manually reviewed to ensure accuracy and integrity. No experimental results or analyses were produced solely by LLMs.

1350  
 1351  
 1352  
 1353  
 1354  
 1355  
 1356  
 1357  
 1358  
 1359  
 1360  
 1361  
 1362  
 1363  
 1364  
 1365  
 1366  
 1367  
 1368  
 1369  
 1370  
 1371  
 1372  
 1373  
 1374  
 1375  
 1376  
 1377  
 1378  
 1379  
 1380  
 1381  
 1382  
 1383  
 1384  
 1385  
 1386  
 1387  
 1388  
 1389  
 1390  
 1391  
 1392  
 1393  
 1394  
 1395  
 1396  
 1397  
 1398  
 1399  
 1400  
 1401  
 1402  
 1403

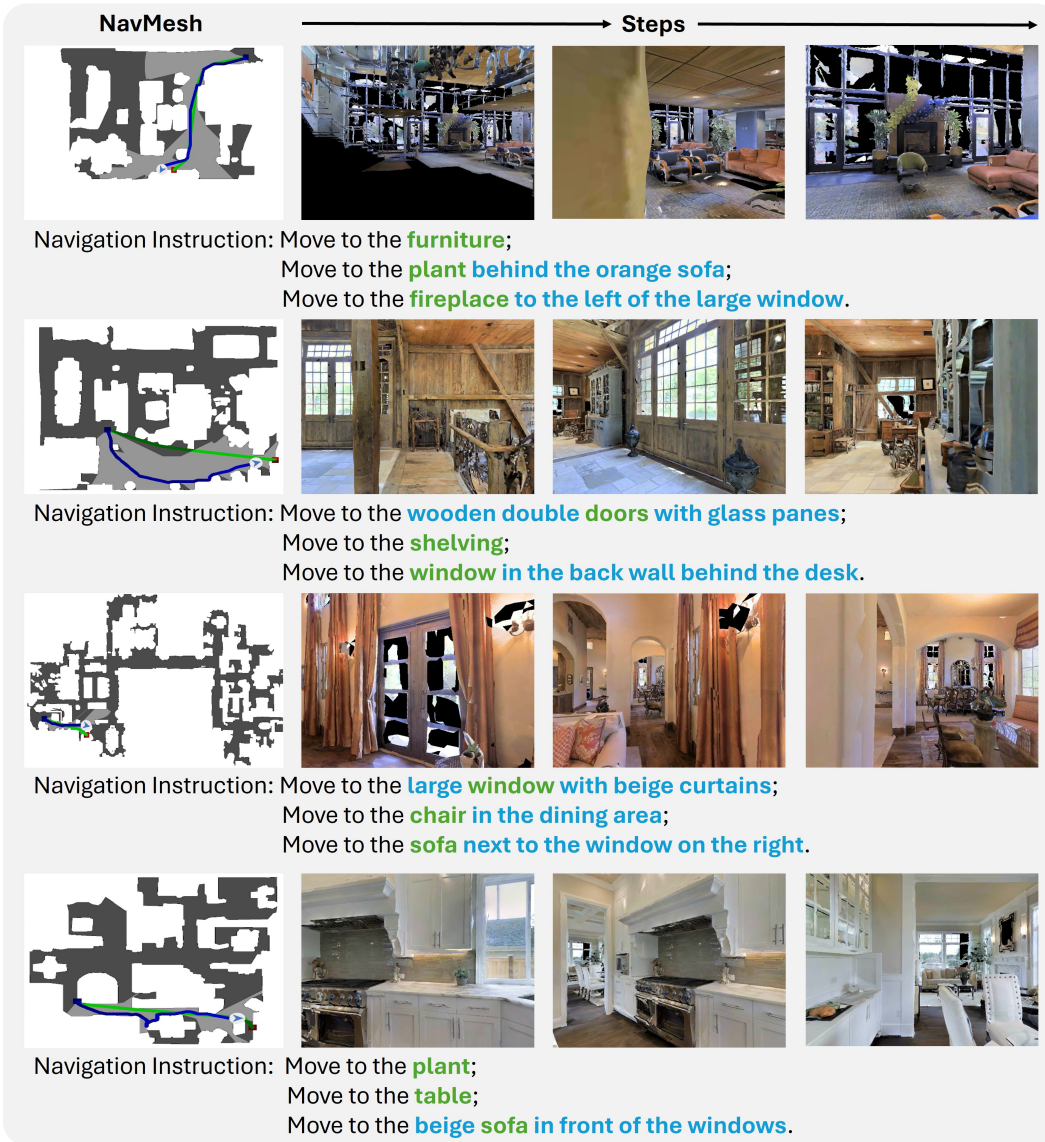

Figure 10: Examples of visualized trajectories and observed images in a multi-step navigation task.
